# Longitudinal immune profiling after radiation-attenuated sporozoite vaccination reveals coordinated immune processes correlated with malaria protection

Fergal J Duffy<sup>1</sup>, Nina Hertoghs<sup>1</sup>, Ying Du<sup>1</sup>, Maxwell L. Neal<sup>1</sup>, Damian Oyong<sup>1</sup>, Suzanne McDermott<sup>1</sup>, Nana Minkah<sup>1</sup>, Jason Carnes<sup>1</sup>, Katharine V Schwedhelm<sup>2</sup>, M Juliana McElrath<sup>2</sup>, Stephen C De Rosa<sup>2</sup>, Evan Newell<sup>2</sup>, John D. Aitchison<sup>1</sup>, Ken Stuart<sup>1</sup>

<sup>1</sup>Center for Global Infectious Disease Research, Seattle Children's Hospital, Seattle, Washington, USA

<sup>2</sup>Vaccine and Infectious Disease Division, Fred Hutch, Seattle, Washington

## ABSTRACT

Identifying immune processes required for liver-stage sterilizing immunity to malaria infection remains an open problem. The IMRAS trial comprised 5x immunizations with radiation-attenuated sporozoites resulting in 55% protection from subsequent challenge. To identify correlates of vaccination and protection, we performed detailed systems immunology longitudinal profiling of the entire trial time course including whole blood transcriptomics, detailed PBMC cell phenotyping and serum antigen array profiling of 11 IMRAS RAS vaccinees at up to 21 timepoints each. RAS vaccination induced serum antibody responses to CSP, TRAP, and AMA1 in all vaccinees. We observed large numbers of differentially expressed genes associated with vaccination response and protection, with distinctly differing transcriptome responses elicited after each immunization. These included inflammatory and proliferative responses, as well as increased abundance of monocyte and DC subsets after each immunization. Increases Vδ2 γδ T cells and MAIT cells were observed in response to immunization over the course of study. Interferon responses strongly differed between protected and non-protected individuals with high interferon responses after the 1<sup>st</sup> immunization, but not the 2<sup>nd</sup>-5<sup>th</sup>. Blood transcriptional interferon responses were correlated with abundances of different circulating classical and non-classical monocyte populations.

This study has revealed multiple coordinated immunological processes induced by vaccination and associated with protection. Our work represents the most detailed immunological profiling of a RAS vaccine trial performed to date and will guide the design and interpretation of future malaria vaccine trials.

## INTRODUCTION

Currently, there exists a single approved malaria vaccine: the subunit-based RTS'S/AS01 (aka Mosquirix) [1]. The RTS'S antigen consists of portions of the circumsporozoite protein (CSP) fused to the viral surface antigen of hepatitis B. However, the efficacy of this vaccine is low: reported as 35.9% i(95% CI, 8.1% to 55.3%) in the first year after vaccination for young children [2], and further reduced at later times. Given that the burden of malaria deaths falls most severely on young children in endemic areas, an improved vaccine is urgently needed. Recently, the R21/MM vaccine candidate, also a CSP protein-based vaccine, has shown promise in this area exhibiting 74-77% efficacy [3], however, the study follow-up period was short and the number of individuals enrolled was relatively small.

A key advantage of CSP as a vaccine antigen is that it is highly expressed on the *Plasmodium falciparum* sporozoite, the form of the parasite injected into the skin by mosquito bite that goes on to infect the liver. The sporozoite represents a population bottleneck, as only low numbers of sporozoites successfully infect the liver and go on to induce a symptomatic blood stage infection. Hence, a successful liver-stage specific vaccine would prevent symptomatic disease and transmission and allow the immune system to face a relatively small number of parasites. Whole-sporozoite vaccines represent an alternative approach to CSP-subunit vaccines. Whole-sporozoite vaccines require the administration of entire sporozoites, which are difficult to mass produce compared to a more traditional protein subunit vaccine platform. However, whole sporozoite vaccination presents an enhanced antigenic repertoire while still targeting the low-parasite burden liver stage. It has long been observed that radiation-attenuated sporozoites are capable of inducing sterilizing immunity against live challenge in both animal and human malaria infection [4–7]. Along with radiation attenuation, sporozoite administration under anti-parasite chemoprophylaxis [8,9] and genetic attenuation [10,11] have also been shown to be effective at preventing infection. Notably, sporozoite administration under chemoprophylaxis has been shown to be capable of eliciting strain-transcendent protection against subsequent challenge [12].

Previous work has described the IMRAS study [13–15], which comprised radiation-attenuated sporozoite vaccination of malaria-naïve individuals who were predominantly male (10 male, 1 female). Studying malaria-naïve rather than malaria experienced individuals allows the clearest picture of the early events involved in protective immunity. It has long been observed that, unlike RAS vaccination, a blood-stage malaria infection will not result in sterilizing immunity to reinfection. but rather a slow development of malaria tolerance after repeated infections [16–19]. Blood stage infection is associated with impaired development of immunity to pre-erythrocytic malaria [20,21].

The IMRAS study was designed with the goal of delivering an intermediate dose of sporozoites that would induce protection in roughly half of the vaccinees, resulting in 55% protection in our study cohort. We have previously published our systems biology analysis of responses to the initial priming immunization in this cohort [13]. The most striking protection-associated

difference we observed was a sharp increase in type I interferon signaling 1 day after immunization in non-protected individuals. Here, we extend our analysis to a comprehensive set of timepoints after all 5 immunizations and incorporate serum antibody profiling in an attempt to disentangle the complex and highly variable blood transcriptional and cell type abundance dynamics that are associated with RAS-induced protection. We saw that transcriptome responses to RAS differed strongly after each immunization. Populations of multiple cell types including V $\delta$ 2  $\gamma\delta$ T cells and MAIT cells expanded over the course of immunizations. Furthermore, the association of increased interferon with non-protection was specific to immunization 1, with immunizations 2-5 showing a positive correlation with interferon associated gene transcription and protection. Interferon's association with protection was correlated with different classical and non-classical monocyte abundances after each vaccination.

## **METHODS AND MATERIALS**

### **Ethics statement**

The study was conducted at the Naval Medical Research Center (NMRC) Clinical Trials Center from 2014 to 2016; controlled human malaria infections (CHMIs) were conducted at the Walter Reed Army Institute of Research (WRAIR) secure insectary. The study protocol was reviewed and approved by the NMRC Institutional Review Board in compliance with all federal regulations governing the protection of human subjects. WRAIR holds a Federal-wide Assurance from the Office of Human Research Protections (OHRP) under the Department of Health and Human Services as does NMRC. NMRC also holds a Department of Defense/Department of the Navy Federal- wide Assurance for human subject protections. All key personnel were certified as having completed mandatory human subjects' protection curricula and training under the direction of the WRAIR Institutional Review Board or the NMRC Office of Research Administration (ORA) and Human Subjects Protections Branch (HSPB). All potential study subjects provided written, informed consent before screening and enrollment and had to pass an assessment of understanding. This study was conducted according to the Declaration of Helsinki as well as principles of Good Clinical Practices under the United States Food and Drug Administration Investigational New Drug (IND) application BB-15767. This trial was performed under an IND allowance by the Food and Drug Administration (FDA).

### **IMRAS study design**

The IMRAS trial (ClinicalTrials.gov NCT01994525) design has been described previously [13–15]. In this work, we analyzed IMRAS Cohort 1, which consisted of 11 individuals who received 5 RAS immunizations via approximately 200 mosquito bites each. Protective efficacy was determined by CHMI with bites from 5 NF54 *P. falciparum* infected mosquitos. Protected individuals were defined as those that remained free of detectable blood stage malaria infection via PCR and thick-blood smear post-CHMI. These vaccinees were accompanied by 3 mock immunized individuals (mosquito bites only) who served as infectivity controls, all of whom were not protected after CHMI.

## **Serum antibody profiling via *P. falciparum* antigen protein array**

Serum samples were taken from the 11 IMRAS RAS vaccinees and 3 mock-immunized study participants at day 0 (pre-vaccination) and day 140 (3 weeks after the fifth immunization and immediately pre-CHMI). Serum was profiled on *P. falciparum* whole-proteome microarrays, (PfWPM: Antigen Discovery Inc, Irvine CA), consisting of 7,455 *P. falciparum* full or partial proteins, representing 4,805 unique genes (91% of the *P. falciparum* proteome), to quantify levels of *P. falciparum* antigen-specific serum antibodies. *P. falciparum* array antigens were produced using either a cell-free ORF-expression clone library followed by *in vitro* transcription/translation (IVTT). After profiling, per-spot microarray signal intensity (MFI) was normalized by taking median foreground intensity minus median background fluorescence intensity based on IVTT control spots subtracted, and log2 transformed. To identify vaccine-induced serum antibody responses, the normalized MFI response was calculated as the increase in normalized MFI per-participant from day 0 to day 140 for RAS-immunized individuals. Significantly induced antibody responses were identified as those increased at least 2-fold from day 0 to day 140 with an FDR-adjusted single tailed t-test significance threshold of 0.05.

## **Whole blood RNAseq**

Whole blood RNAseq was performed as previously described [13] on 11 IMRAS Cohort 1 RAS vaccinees. Whole blood was collected directly into PAXgene blood RNA tubes (PreAnalytiX, Hombrechtikon, Switzerland) and stored at -20°C. RNA extraction and globin transcript depletion (GlobinClear, ThermoFisher Scientific, MA, USA) were performed prior to cDNA library preparation using the Illumina TruSeq Stranded mRNA sample preparation kit (Illumina, CA, USA). Globin transcript depletion, cDNA library preparation and RNA sequencing were performed by the Beijing Genomics Institute (Shenzhen, China). A total of sixty-six RNAseq samples were sequenced, with a target depth of 30 million reads per sample. Samples from four timepoints (day 0, 35, 119, 140) were sequenced on Illumina (San Diego, CA) Hiseq2000 sequencers using 75 base-pair (bp) paired-end reads. The remaining samples were sequenced on BGI500 sequencers using 100 bp paired-end reads.

## **RNAseq differential expression and gene-set enrichment analysis**

Raw RNAseq fastq files were filtered for quality control by adjusting base calls with phred scores < 5 to 'N', and read pairs for which either end had fewer than 30 unambiguous base calls were removed. Read pairs were aligned to the human genome (hg19) using STAR (v2.3.1d) [22]. Gene count tables were generated using htseq (v. 0.6.0) [23] with the intersection-strict setting on and Ensembl gene annotations (GRCh37.74) used to link genomic locations to gene identifiers. Raw aligned RNAseq counts were normalized to account for different sequencing platforms (Hiseq2000 vs BGI500) using ComBat-seq [24], taking advantage of 4 samples resequenced on both sequencers to ensure an unbiased data transformation. Principal component analysis was performed on log-transformed counts-per-million gene expression data.

The R limma and voom packages [25,26] were used to identify differentially expressed genes augmented by the dream package [27] to allow the use of a mixed modelling approach. Timepoint and protection were set as fixed effects, including interaction terms, with a random intercept for each participant. For each gene, models were fit using the formula:

$$geneExpression \sim protection * timepoint + (1|participant)$$

To identify genes significantly changed in expression relative to the day of most recent immunization, i.e. vaccine-induced genes, contrasts were constructed of the form ‘timepoint – most recent immunization timepoint’, e.g. ‘D003 – D000’ represents changes at day 3 relative to day 0 (day of first immunization). An FDR cutoff of 0.05 was used to identify significant genes at all timepoints. Protection-associated genes were identified by F-test, as implemented in the limma topTable function, to identify genes that where any combination of protection:timepoint interaction coefficients were significant.

Gene-set enrichment analysis (GSEA) was performed using the R fgsea package [28], using the BloodGen3 coherently expressed blood transcriptional modules (BTMs) [29]. Gene rankings used as input for GSEA were based on estimated log2 fold changes obtained from the limma-dream model. The limma topTable function was used to extract fold changes for each ‘timepoint – most recent immunization induced timepoint’ contrast, which were input to fgsea to calculate vaccine-induced BTM enrichment. Similarly each protection:timepoint interaction coefficient was used to input fold changes into fgsea to to identify enriched protection-associated BTMs.

BTM expression was calculated as the 25% trimmed mean of log-transformed counts-per-million gene expression of each BloodGen3 BTM gene, per sample. BTMs with reliable expression in less than half of their genes were excluded. Non-coherent BTMs, defined as BTMs where less than half of their genes were strongly correlated (Pearson’s  $r > 0.5$ ) with the trimmed mean of BTM expression were also excluded.

### **PBMC flow cytometry profiling**

Flow cytometry profiling was carried out using previously published antibody panels and gating strategies [13,30,31]. PBMCs were collected from IMRAS participants and frozen for later use. After thawing in RPMI supplemented with 10% FBS and benzonase nuclease (Millipore EMD 0.05 U/ml), the samples were incubated with LIVE/DEAD Fixable Blue Dead Cell Stain Kit and the Human BD Fc Block for 30 min at room temperature before being simultaneously stained with four phenotyping panels as shown in OMIP-044 [30], OMIP-064 [31] and **Table S 1**. The cells were then profiled using a BD FACSymphony flow cytometer. The data were analyzed, and cellular populations gated and quantified as previously using FlowJo Software (version 9.6.6). The abundance of each manually gated cell subset was calculated as a percentage, using the counts of each defined cell subset divided by the total single live cells from that sample.

### **Statistical analysis of flow-cytometry cell counts**

Mixed models were used to identify vaccine-induced (i.e. significantly changed in abundance over time) and protection-associated cell type subsets using the R lme4 package [32]. A nested approach was taken where a ‘full’ model including protection and timepoint as fixed effects, as well as interaction terms, was compared to protection-only and timepoint-only fixed effect models. In all cases, per-participant intercepts were fit as random effects.

*FULL: cellTypeAbundance ~ protection \* timepoint + (1|participant)*

*TIMEONLY: cellTypeAbundance ~ timepoint + (1|participant)*

*PROTONLY: cellTypeAbundance ~ protection + (1|participant)*

ANOVA was used to compare the FULL model to the TIMEONLY model (to determine the effect of protection on abundance) and the PROTONLY model (to determine the effect of sampling timepoint on abundance) and calculate associated p-values, and an FDR threshold of 0.05 was applied to determine significance.

## RESULTS

### The IMRAS study

The IMRAS study design has previously been described [13–15]. Briefly, study participants were immunized five times with radiation attenuated *P. falciparum* NF54 sporozoites (RAS) delivered by mosquito bite, with roughly 200 bites per-immunization. Immunizations were spaced 4-5 weeks apart with protection determined by controlled human malaria infection (CHMI) three weeks after the final immunization. In this study, we analyzed serum antibody levels, whole blood transcriptomics and PBMC cell phenotypic profiles from the 11 RAS-immunized (6 protected, 5 non-protected) participants in IMRAS Cohort 1. The cohort also included three mock-immunized individuals who received sporozoite-free mosquito bites followed by CHMI on the same schedule as RAS vaccinees. Serum, PBMCs and whole-blood PAXgene samples were obtained for up to 5 timepoints per-immunization per-participant for analysis (**Table 1**)

**Table 1:** IMRAS sampling schedule. X indicates where specific sample types were taken.

|             | Imm 1 |   |   |   |    | Imm 2 |    |    |    | Imm 3 |    |    |    | Imm 4 |    |    | Imm 5 |     |     |     | CHMI |
|-------------|-------|---|---|---|----|-------|----|----|----|-------|----|----|----|-------|----|----|-------|-----|-----|-----|------|
| Day         | 0     | 1 | 3 | 7 | 14 | 28    | 31 | 35 | 42 | 56    | 59 | 63 | 70 | 84    | 87 | 91 | 119   | 120 | 122 | 126 | 140  |
| Whole blood | X     | X | X | X | X  | X     | X  | X  | X  | X     | X  | X  | X  | X     | X  | X  | X     | X   | X   | X   | X    |
| PBMC        | X     |   | X | X | X  |       |    |    |    | X     | X  | X  | X  |       |    |    | X     |     | X   | X   |      |
| Serum       | X     |   |   |   |    |       |    |    |    |       |    |    |    |       |    |    |       |     |     |     | X    |

### RAS immunization induced detectable serum antibody responses

Serum samples were taken from all 11 vaccinees and 3 mock-immunized individuals immediately prior to immunization (day 0) and challenge (day 140). Each individual serum was screened on *P. falciparum* antigen protein arrays [Antigen Discovery Inc.] to detect the



presence of *P. falciparum*-specific antibodies. Strongly significant antibody responses to three *P. falciparum* proteins: circumsporozoite protein (CSP), Apical membrane antigen 1 (AMA1) and thrombospondin related adhesion protein (TRAP) were seen in RAS immunized individuals (Figure 1 A). All three of these proteins are known to be expressed on the surface of on the apical membrane of *P.falciparum* sporozoites, and are involved in hepatocyte invasion and binding [33–35]. Antibody responses did not significantly differ between protected and non-protected individuals (Figure 1 B).

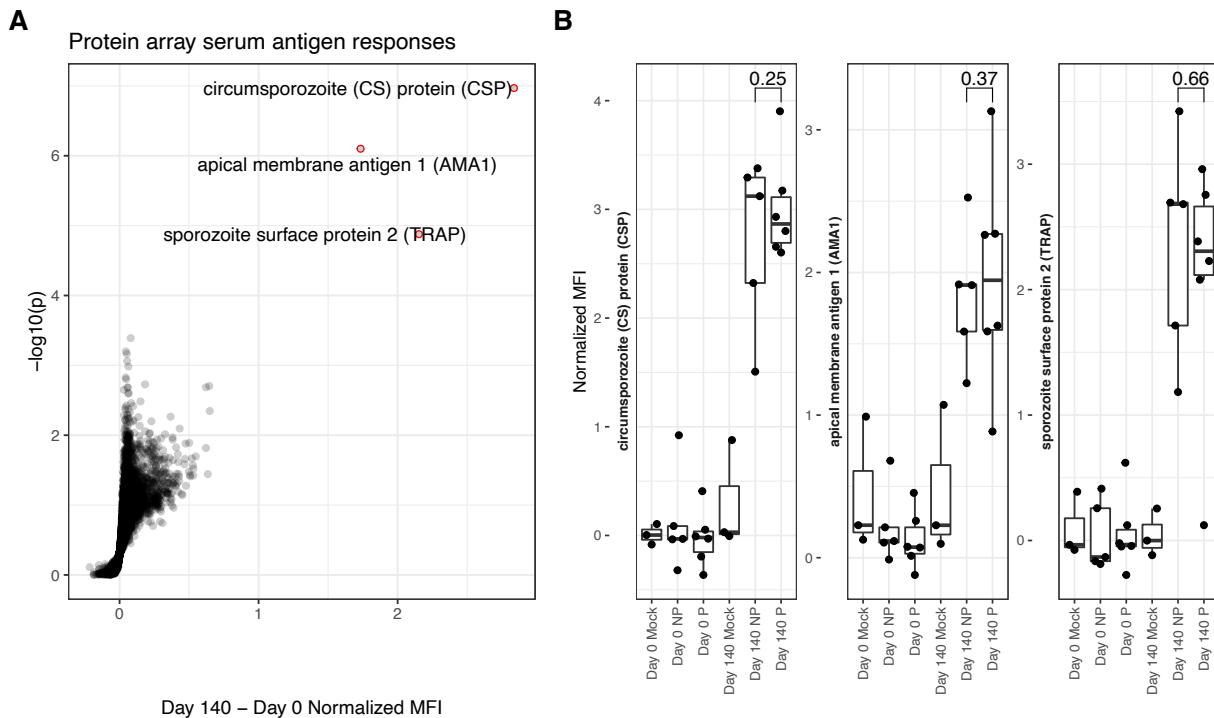

**Figure 1:** Protein array determined serum antigen responses. **A.** Volcano plot. X-axis shows increase in protein array normalized mean fluorescent intensity (MFI) from pre-immunization (day 0) to immediately pre-challenge (day 140) timepoints for RAS-immunized participants. Y-axis shows matching log-transformed false-discovery rate (FDR) adjusted single-tailed t-test p-values. Significant (FDR < 0.05) and highly increased (MFI increase > 1) antibody responses are highlighted with red circles and labelled with the corresponding protein. **B.** Box and dot-plots of pre-vaccine and pre-challenge MFIs for each study participant for labelled antibody responses from **A.** shown separately for protected (P) and non-protected (NP) RAS vaccine recipients. Mock immunized individuals are included for reference. T-test p-values comparing pre-challenge antibody binding MFIs between P and NP individuals are indicated.

## Differential expression analysis revealed vaccine-induced and protection-associated genes

To identify vaccine-induced responses that correlate with protection, we carried out longitudinal whole blood transcriptomic profiling of IMRAS RAS vaccinees over the entire course of repeated immunizations. A mixed modelling approach was applied (see **Methods**) to identify genes that were responsive to vaccination and/or associated with protection that also accounted for gene expression levels primarily attributable to per-participant effects. Principal component analysis of transcriptome profiles showed that whole blood expression profiles

clustered closely together by participant, rather than by longitudinal timepoint (**Figure S 1**), underscoring the need to incorporate transcriptional per-participant effects as a factor in our differential expression analysis.

Vaccine-induced differentially expressed genes (DEGs) were identified as those significantly changed in expression in blood relative to the most recent previous immunization. Hundreds of vaccine-induced DEGs were identified (FDR < 0.05) at the majority of timepoints across the entire course of immunizations (**Figure 2 A, Datafile S 1**). Most strikingly, we observed large numbers of genes decreased in expression after the second immunization. In contrast, there were relatively few vaccine induced DEGs seen after the third immunization. We quantified the overlap of these DEGs with the recently published BloodGen3 [29] coherent blood transcriptional modules (BTM) to interpret biological processes induced post-immunization. BTMs significantly enriched in vaccine-induced genes that were uniformly increased or decreased per-timepoint are shown in **Figure 2 B** (FDR-adjusted hypergeometric p-value < 0.05). Genes increased in expression in the two weeks after the first immunization were enriched for interferon, oxidative phosphorylation and erythroid cell BTMs. Genes reduced in expression after the second immunization were enriched for protein synthesis, protein modification, gene transcription and oxidative phosphorylation BTMs at multiple timepoints. Fewer significant BTMs were identified in DEGs after the 3<sup>rd</sup> – 5<sup>th</sup> immunizations, although BTMs representing cell death, and inflammation were increased 3 days after the 3<sup>rd</sup> immunization. Numbers and expression patterns of DEGs and accompanying enriched BTMs were highly distinct after each immunization.

We also found 21 genes significantly associated with protection when considering all timepoints together (**Figure 2 C**). The 21 protection-associated genes significantly overlapped (FDR-adjusted hypergeometric p =  $3 \times 10^{-8}$ ) with a single BTM: six protection-associated genes (EPSTI1, IFI44L, IFI6, ISG15, LY6E, RSAD2) are members of BTM M8.3 representing Type I Interferon responsive genes. These genes were also increased in expression immediately post-immunization, but whereas non-protected individuals had high and sustained increased expression of these genes after the first immunization, protected individuals had stronger increases after the remaining 4 immunizations (**Figure 2 C**). This suggests that while interferon responses are broadly associated with protection during RAS immunization, the effect of increased interferon gene expression on protection may change over the course of vaccination. 13 of these 21 total protection-associated genes and 5 of 6 type I interferon protection-associated genes were also significantly vaccine-induced to for at least one timepoint.



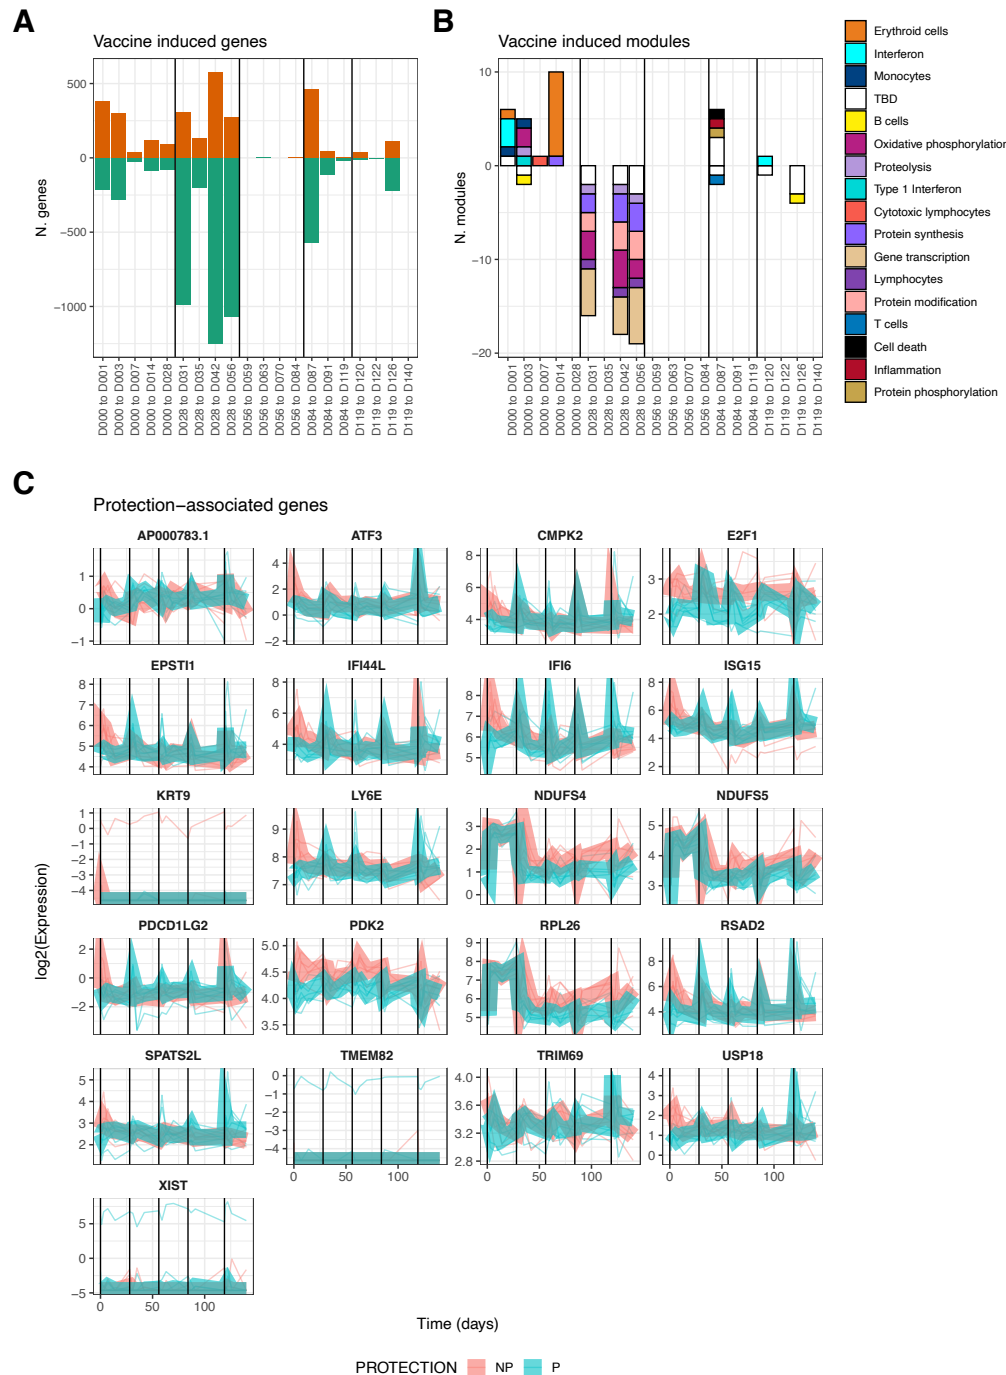

**Figure 2:** Differentially-expressed genes associated with vaccine-induced and/or protection-associated responses to immunization. **A.** Bar plot showing counts of genes significantly increased (positive) or decreased (negative bar) relative to the day of the most recent vaccination. **B.** Bar plot showing counts of BloodGen3 modules enriched in genes shown in **A.**, per-timepoint and direction (positive bars represent modules enriched in genes with increased expression relative to the day of the most recent immunization, negative bars represent enrichment for genes with decreased expression). Module functional annotation is shown by the color key. **C.** Line plots showing per-individual normalized expression of each protection-associated gene over time colored by protection status. Group-averaged expression is shown as a ribbon. For all panels, vertical black lines indicate times of immunizations.

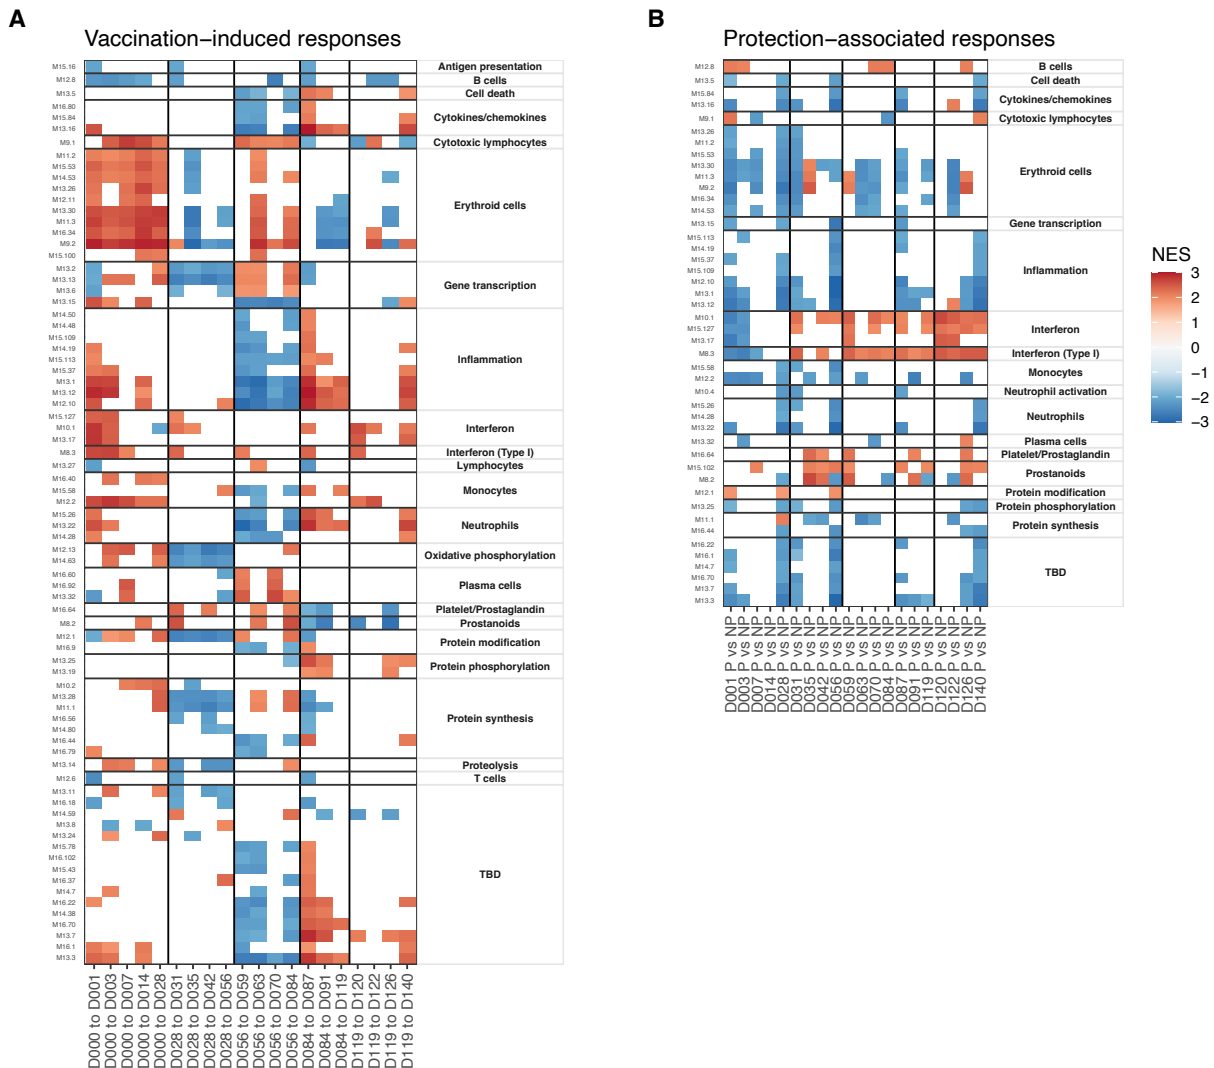

**Figure 3:** Gene set enrichment analyses showing patterns of vaccine-induced and protection-associated responses profiled using blood transcription modules (BTMs). Heatmaps show significant (FDR < 0.05) normalized enrichment scores (NES). **A.** BTMs significantly enriched for genes changing in expression relative to day of the most recent immunization. **B.** BTMs significantly enriched for genes with expression differences between protected and non-protected individuals at each timepoint. Vertical black lines indicate times of immunizations in both panels

### Gene-set enrichment analysis revealed complex timing of vaccine responses

Modules identified as having enriched overlap with DEGs were limited by the binary significance cutoff used to identify DEGs. Therefore, we applied gene-set enrichment analysis (GSEA) to identify BTMs that were significantly enriched in the full rank-ordered gene list. Genes were ranked based on the above determined linear model coefficients and normalized enrichment scores (NES) calculated to classify BTMs as being increased or decreased relative to the day of the most recent immunization (**Figure 3 A**) or associated with protection at a specific timepoint (**Figure 3 B**). Overall, vaccine-induced responses identified as enriched in DEGs (**Figure 2 B**) were also captured in the GSEA analysis; for example, increased interferon and erythroid cell BTMs after the first immunization, and decreased gene transcription and protein

synthesis BTMs after the second immunization. However, the vaccine-induced GSEA captured many events after the third, fourth and fifth immunizations not seen in the DEG-based analysis. This includes increases in erythroid cell and gene transcription and decreased inflammation after the third immunization as well as increased inflammation, interferon and protein phosphorylation after the fourth and fifth immunization. Many significantly enriched BTMs fall into the 'TBD' category, where the overall functional annotation was not determined. These show enrichment patterns similar to inflammation and cytokine/chemokine BTMs, suggesting co-ordination with defined immune responses. Concordant with the individual DEG analysis, we saw highly distinct response patterns induced after each immunization.

Focusing on protection-associated BTMs, we saw more consistent patterns after each immunization. The majority of protection-associated processes comprised BTMs annotated as associated with specific immune cell types (adaptive and innate immune cells), cytokines, erythroid cell and inflammation and proliferation (protein synthesis/phosphorylation/modification) that were consistently reduced in protected individuals relative to non-protected individuals 1-3 days after each immunization (**Figure 3 B**). As with the vaccine-responsive BTMs above, 'TBD' modules mimicked the protection-associated enrichment patterns of inflammation associated BTMs. Interferon and prostanoid BTMs which were increased in protected participants immediately after immunizations 2-5, but not the first immunization. These interferon responses are consistent with what was observed in the DEG analysis above.

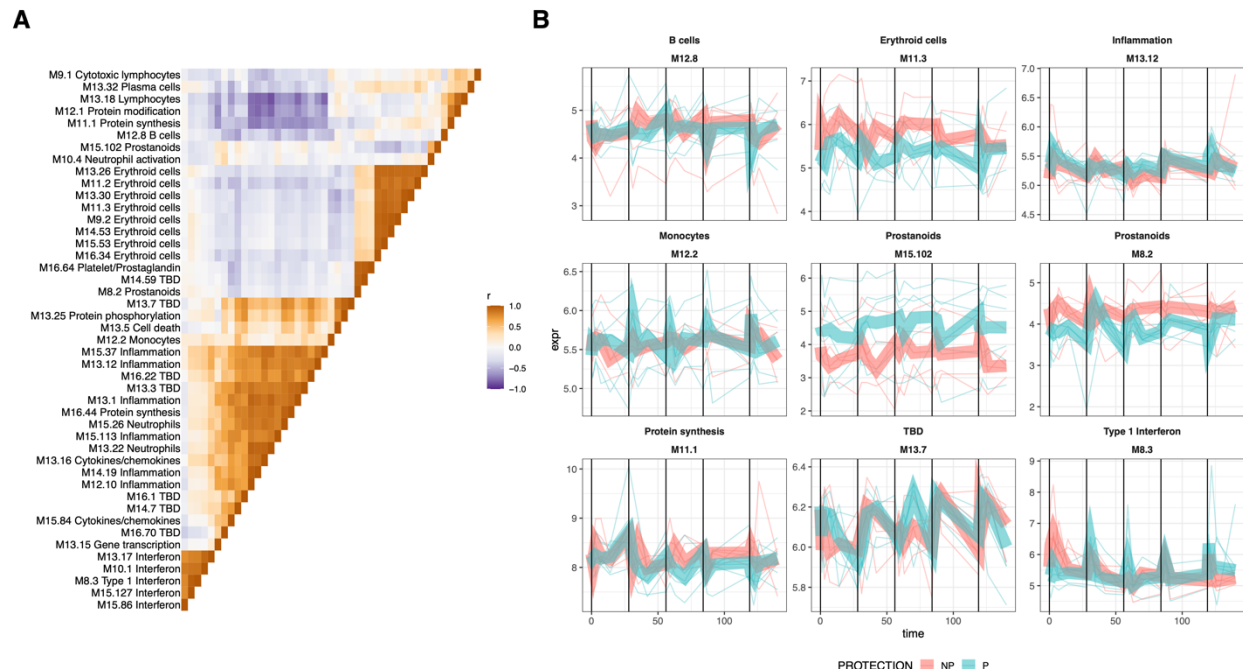

**Figure 4:** Expression dynamics of protection-associated BTMs. Expression of protection-associated BTMs identified by GSEA was calculated as the average of BTM gene expression and used to create a BTM correlation matrix. **A.** The BTM correlation matrix, with BTM-BTM correlation coefficients (Pearson's r) indicated, and BTMs ordered identically on the x- and y-axes by hierarchical clustering of the correlation matrix. **B.** Averaged expression of

representative BTMs from subclusters in **A**, plotted with lines representing individuals BTM expression, colored by protection status. Protection group average expression shown as thick ribbons

### **Hierarchical clustering revealed distinct patterns of protection-associated responses**

In order to decipher the different patterns of protection-associated responses, we calculated average BTM expression and hierarchically clustered the modules based on their correlation matrix. BTMs that shared a functional annotation tended to cluster closely (**Figure 4 A**) with Interferon BTMs and erythroid cell BTMs forming highly distinct clusters. We also observed a distinct cluster that represented inflammation/neutrophil/cytokine BTMs. This indicated that BTMs representing similar functional annotations shared coherent expression patterns. Representative BTMs were then selected from these sub-clusters and their averaged expression was plotted (**Figure 4 B**). Alongside the previously noted type I Interferon BTM, we observed a variety of protection-associated expression patterns, including both transient responses to vaccination and sustained protection-associated differences over the study. Notably, M12.2 monocyte BTM expression showed strong increases in protected individuals shortly after immunizations 2-5. In contrast, the M11.3 erythroid cells and M8.2 prostanoid BTMs showed sustained increased expression in non-protected individuals throughout the study. Thus, GSEA revealed numerous functional gene sets and expression dynamics that were correlated with protection.

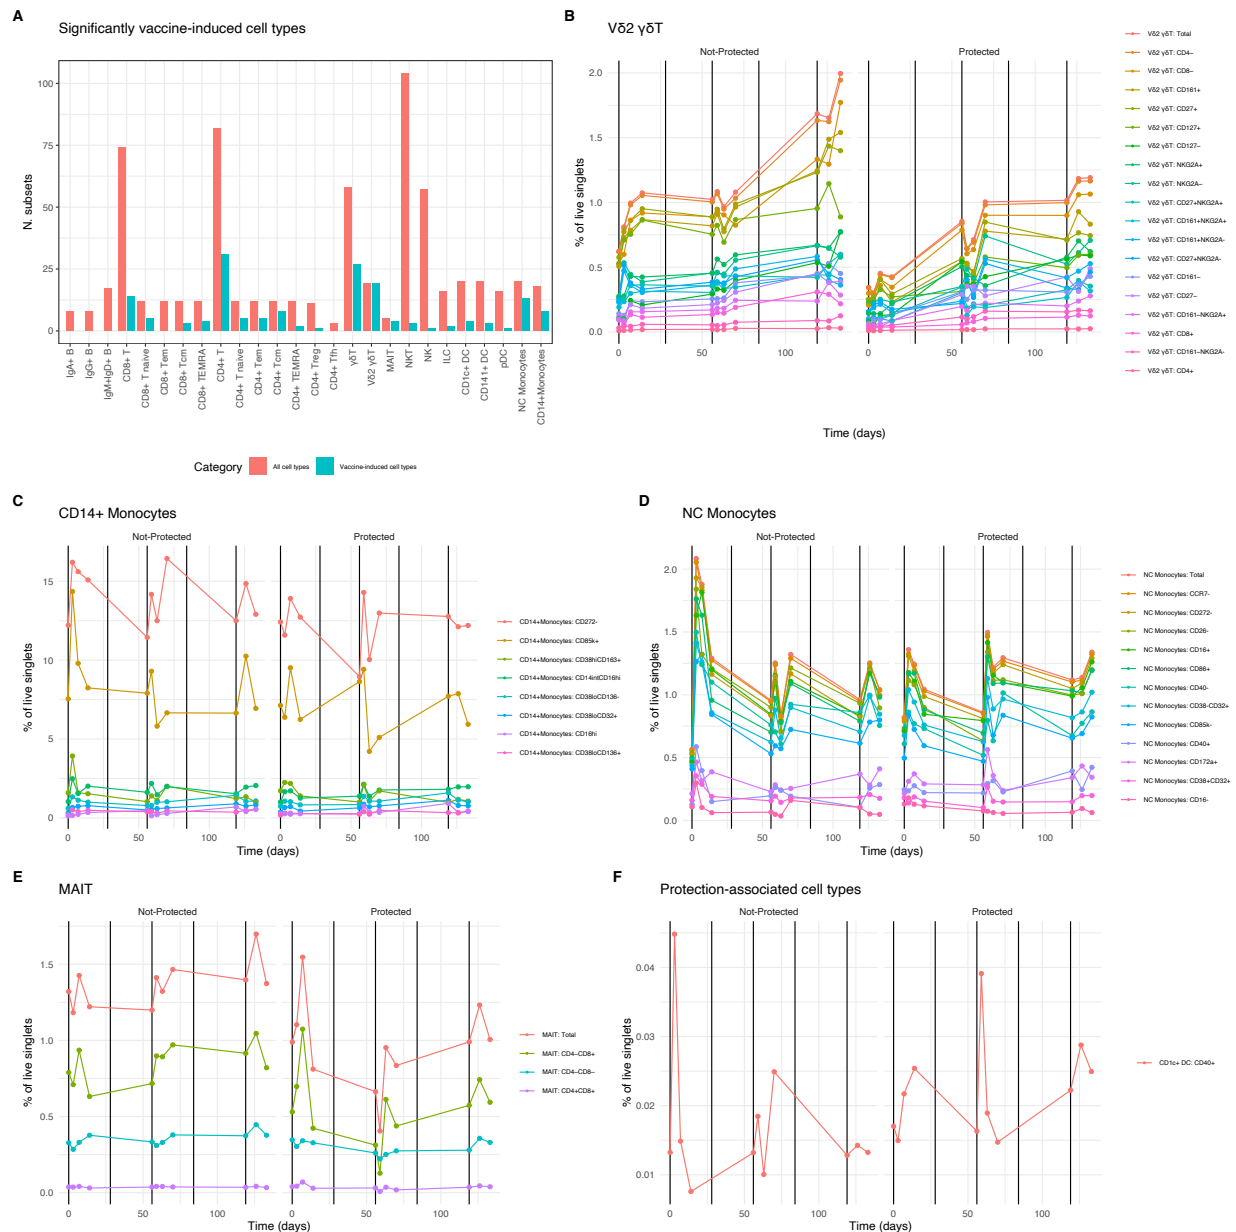

**Figure 5: Cell type responses to RAS vaccination.** **A.** Counts of significantly (FDR < 0.05) vaccine-induced cell types grouped by lineage and/or function. Red columns indicate total numbers of gated subsets in the corresponding group, adjacent teal columns show proportion of gated subsets that were vaccine-induced. **B-E** Averaged counts of vaccine-induced cell types showing vaccine induced cell types from specific lineage/function groupings in **A.**, over time. Vertical black lines indicate vaccination times. Legend shows color for each gated cell type subset, ordered from most abundant (top) to least abundant (bottom). **B.** Vδ2 γδT cells, **C.** Classical CD14+ monocytes, **D.** Non-classical (NC) monocytes, **E.** MAIT cells. **F.** Averaged counts of the protection-associated (FDR < 0.05) cell type: CD1c+ CD40+ DCs.

## Monocyte, Dendritic cell and invariant T cell populations were responsive to RAS vaccination

To better understand the cellular RAS vaccination response profile, we performed high-parameter flow cytometry profiling of PBMCs taken from the IMRAS vaccinees at timepoints

overlapping with whole blood gene expression (**Table 1**). Four protein marker panels were used, consisting of 21-28 markers each, specific for B cells, T cells, antigen-presenting cells, and NK/ILC/  $\gamma\delta$  T cells (**Table S 1**). An extensive gating strategy was applied (see Methods) to determine counts for hundreds of different cell types and corresponding activation states (**Datafile S 2**). As with whole-blood transcriptomics, cell abundance profile variability was most strongly predicted by person-to-person variability (**Figure S 2**) rather than by vaccine-induced changes, which necessitated a mixed-modelling approach to account for this variability while identifying vaccine-induced cell subsets.

Mixed-modelling revealed vaccine-induced cell types (**Figure 5 A, Datafile S 3**) including V $\delta$ 2  $\gamma\delta$  T (**Figure 5 B**) cell subsets, classical CD14<sup>+</sup> monocyte subsets (**Figure 5 C**), non-classical (NC) monocyte subsets (CD11c<sup>+</sup> HLA-DR<sup>+</sup> CD16<sup>+</sup>) (**Figure 5 D**) MAIT cell subsets, (**Figure 5 E**), and CD4<sup>+</sup> and CD8<sup>+</sup> T cell subsets. We observed few or no changes in B cell, NK cell or NKT cell subsets. Several cell type groupings showed coherent changes in abundance over the course of vaccination: NC monocyte subsets were rapidly and transiently increased after immunizations 1 and 3 and 5 in both protected and non-protected individuals. Larger increases were apparent in non-protected individuals after the first immunization with smaller increases after the third immunization, while the opposite pattern was observed in protected individuals (**Figure 5 B**). In contrast, V $\delta$ 2  $\gamma\delta$  T cell subsets continuously increased over the course of vaccination and this increase was more apparent in non-protected individuals (**Figure 5 C**). Similar to NC monocytes, classical CD14<sup>+</sup> monocytes subsets showed transient increases after each immunization (**Figure 5 D**). CD272<sup>-</sup> (a.k.a. BTLA: B-and T-lymphocyte attenuator) and CD85k<sup>+</sup> (a.k.a. LILRB4, leukocyte immunoglobulin-like receptor B4) CD14<sup>+</sup> monocytes represented the most abundant induced monocyte populations. For both CD272<sup>-</sup> and CD85k<sup>+</sup> monocytes, increased abundance was apparent at the earliest post immunization 1 timepoint (day 3) in non-protected individuals, but not until day 7 post-immunization for protected individuals. A distinct pattern was observed for MAIT cell abundance. Total MAIT cell abundance was generally increased after each immunization for both protected and non-protected individuals. However, increases in total and CD8<sup>+</sup> MAIT cells were stronger and more rapid in protected individuals after the first immunization. (**Figure 5 E**). Vaccine-induced T cell subsets, both CD4<sup>+</sup> and CD8<sup>+</sup>, were not confined to a single memory or effector phenotype. However, since malaria sporozoite-specific T cells represent a small (or zero) proportion of total T cells it is unclear what is driving changes in circulating T cell proportion. These changes may simply reflect changes in the total number of circulating myeloid cells in response to vaccination.

It is important to note that none of the protection-associated trends listed in the vaccine-induced cell types described above reached statistical significance. We identified a single significantly protection-associated cell type: CD40<sup>+</sup> CD1c<sup>+</sup> DCs (**Figure 5 F**). These showed a similar overall expression pattern as the NC monocytes, but with a more pronounced increase in abundance in non-protected individuals after the first immunization and a more pronounced spike in protected individuals after the third immunization. In summary, we observed that myeloid cell types including classical CD14<sup>+</sup> monocytes, non-classical monocytes and DCs tended to show similar vaccine response and protection dynamics as type I interferon-



associated gene expression, while other vaccine responsive lymphoid cell types such as MAITs and Vδ2 γδT cells had distinct response patterns over time.

### **Combined analysis of cell populations and gene expression revealed cell types correlated with vaccine-induced and protection-associated transcriptional responses**

To better understand the relationships between cell type abundances and transcriptional responses after RAS immunization, we created a comprehensive correlation map relating RAS induced BTM expression to cell type abundances. Correlations between BTM expression and vaccine-induced cell type abundances were calculated by matching transcriptomic profiles with flow-cytometry derived cell type abundances from each participant at shared timepoints (**Table 1**). Multiple significant cell type-BTM correlated pairs were observed (**Figure 6 A**), and these correlations often reflected known functions of the cell type in question. For example, BTMs with the 'inflammation' functional annotation were correlated with CD14+ monocyte subsets and BTMs with the 'cytotoxic lymphocyte' annotation were correlated with γδ T cells. Many BTM functionally annotated as 'antigen presentation', 'lymphocytes', 'T cells', and 'cell cycle' were specifically correlated with naïve CD4+ and CD8+ T cell subset abundance (**Figure 6 B**), possibly reflecting initiation of adaptive responses post immunization.

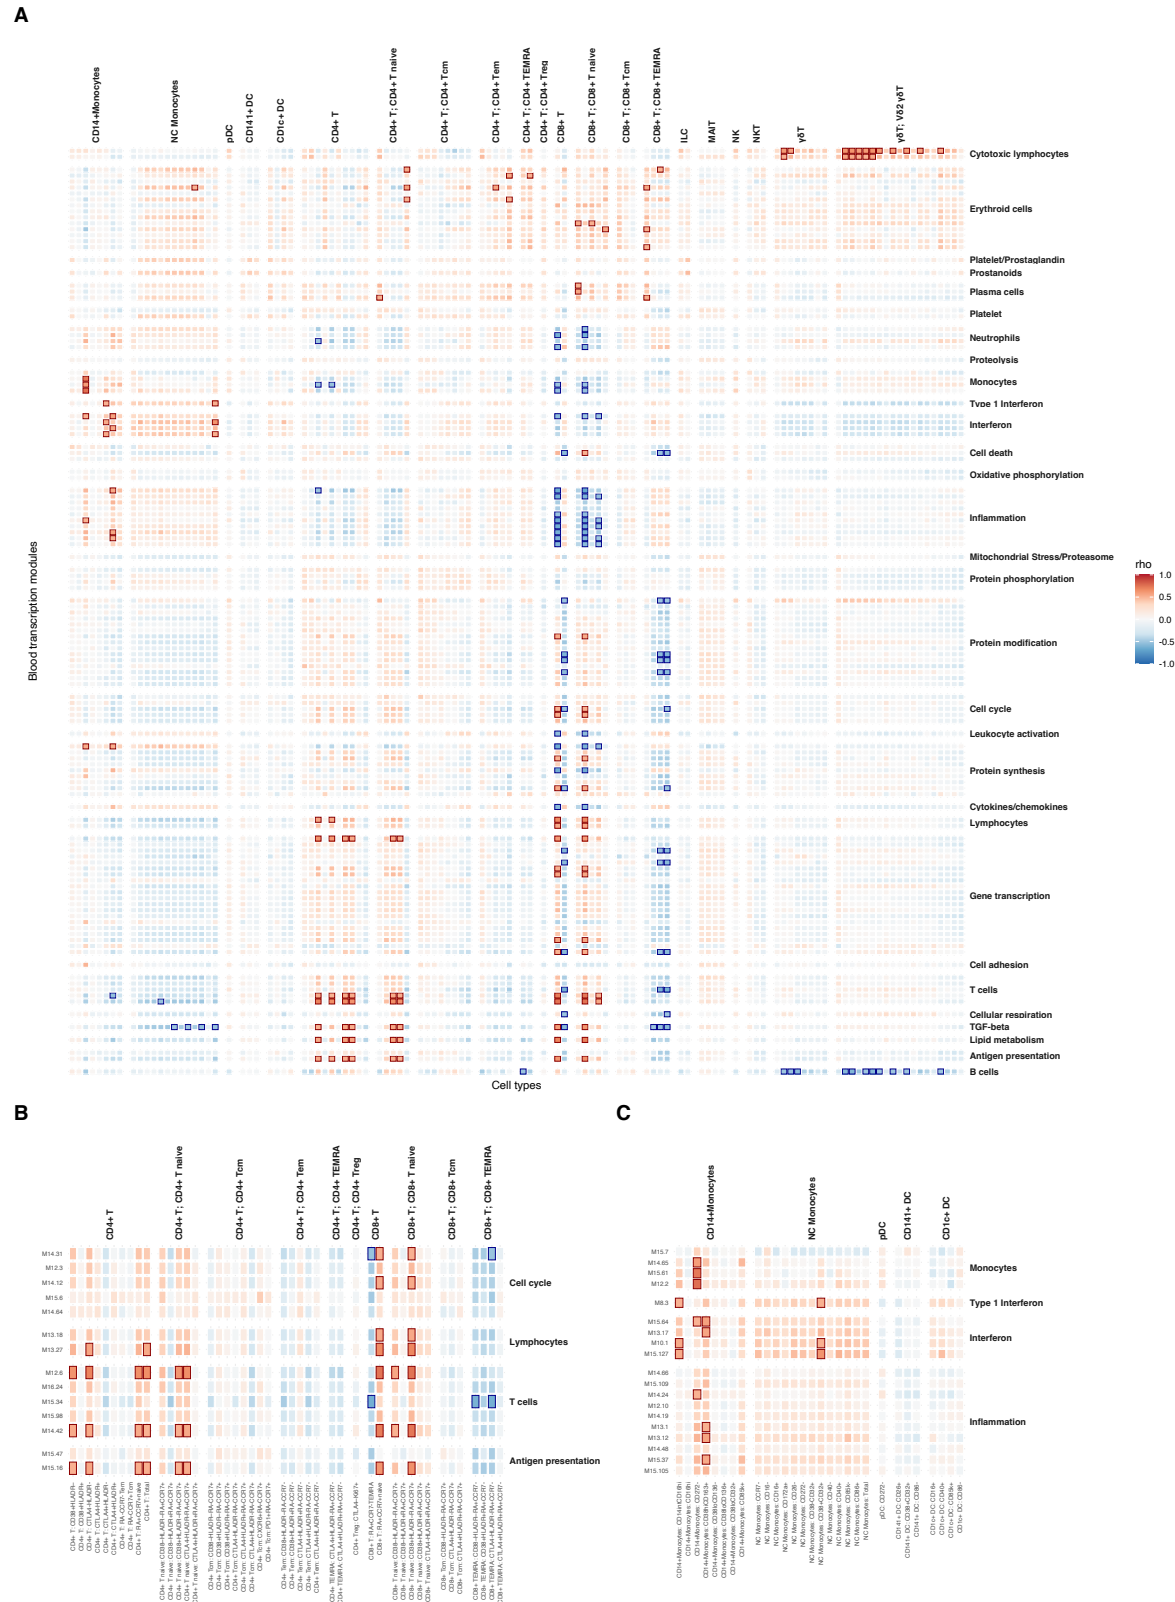

**Figure 6: Correlations between vaccine-induced cell type abundances and vaccine-induced BTM expression. A.** Heatmap showing Spearman correlations between vaccine-induced cell type abundance and average BTM

expression. Only BTMs with at least one significant cell type correlation are shown. Strong positive and negative ( $|\rho| > 0.5$  &  $FDR < 0.05$ ) correlations are highlighted with red and blue boxes respectively. **B.** Subset of heatmap **A.** with T cell subsets labelled. **C.** Subset of heatmap **A.** with DC and Monocyte subsets labelled.

Several monocyte subsets were significantly ( $FDR < 0.05$ ) and strongly positively correlated (Spearman's  $\rho > 0.5$ ) with Interferon BTM expression, specifically the CD16hi, CD272- and CD38hiCD163+ subsets of CD14+ monocytes, and CD38+CD32+ NC monocytes (**Figure 6 C**). Vaccine-induced NC monocyte subsets were uniformly positively correlated (all NC monocyte – interferon  $\rho > 0.2$ ) with all 4 interferon BTMs. While most CD14+ monocyte populations were positively correlated with interferon BTMs, this was not always the case for CD38lo CD32+ or CD16hi populations of CD14+ monocytes. Therefore, it appeared that NC monocyte abundance was linked to interferon expression in the blood across the entire study period regardless of NC monocyte activation/maturity status, while this was not the case for CD14+ monocyte populations.

**Table 2:** Numbers of DC/monocyte subsets significantly ( $FDR < 0.05$ ) and positively ( $\rho > 0.25$ ) correlated with at least one interferon BTM after each immunization.

|                       | All timepoints<br>(Day 0 -140)                                                                                       | Immunization 1<br>(Day 0 - 28) | Immunization 3<br>(Day 56 - 81)                                                      | Immunization 5<br>(Day 119-140) |
|-----------------------|----------------------------------------------------------------------------------------------------------------------|--------------------------------|--------------------------------------------------------------------------------------|---------------------------------|
| <b>CD14+Monocytes</b> | CD14intCD16hi<br>CD272-<br>CD38hiCD163+<br>CD85k+                                                                    | CD272-<br>CD38hiCD163+         | CD14intCD16hi<br>CD272-<br>CD38hiCD163+                                              |                                 |
| <b>CD1c+ DC</b>       | CD16+<br>CD40+                                                                                                       |                                | CD40+                                                                                |                                 |
| <b>NC Monocytes</b>   | Total<br>CCR7-<br>CD16-<br>CD16+<br>CD26-<br>CD272-<br>CD38-CD32+<br>CD38+CD32+<br>CD40-<br>CD40+<br>CD85k-<br>CD86+ | CD38+CD32+                     | Total<br>CCR7-<br>CD16+<br>CD26-<br>CD272-<br>CD38+CD32+<br>CD40+<br>CD85k-<br>CD86+ |                                 |

To further explore the temporal linkage between interferon transcriptional responses and DC/monocyte abundance, we investigated how the strength of their correlation varied over time. After immunization 1 (day 0-28) specifically, 2 CD14+ monocyte subsets were significantly positively correlated with interferon BTM expression. In contrast only 1 NC monocyte subset and no CD1c+ DCs (**Table 2**) were correlated with interferon BTMs. This changed after immunization 3, when 9 NC monocyte subsets, including total NC monocyte counts, were significantly correlated with interferon along with 3 CD14+ monocyte subsets and one CD1c+

DC subset (the protection associated CD1c+ CD40+ DC subset). This suggests that non-protection associated interferon responses after immunization 1 are primarily associated with subsets of CD14+ monocytes, while protection-associated interferon responses after immunization 3 were correlated with increased abundance of a wider spectrum of both CD14+ and NC monocyte populations.

## DISCUSSION AND CONCLUSIONS

Radiation-attenuated sporozoite vaccination is known to induce sterilizing protection against malaria, and many studies have investigated its protective efficacy and immune consequences [13,14,36–39]. Our work stands out as the most comprehensive profiling to date of radiation-attenuated sporozoite immunization and challenge in malaria naïve individuals. Previously [13], we reported that increased abundance of type I interferon-associated genes in blood were associated with a lack of protection in malaria-naïve RAS vaccinees after the first immunization. Here we extend our analysis by showing that interferon responses are subsequently increased more strongly in protected relative to non-protected individuals after subsequent boosting immunization. We also identified several other independent transcriptional pathways associated with RAS-induced malaria protection. Furthermore, high levels of interferon-associated gene transcription in blood after the first immunization were correlated with a small number of specific classical CD14+ monocyte subpopulations, while peripheral interferon responses to subsequent immunizations were correlated with increased abundance of broader range of classical and non-classical monocytes, along with CD1c+ dendritic cells.

Serum antibody profiling revealed robust serum antibody responses to abundant sporozoite surface antigens, i.e. CSP, TRAP and AMA1, that were vaccine-induced but not protection-associated. We did not see significant changes in B cell subset abundances in blood induced by vaccination, or associated with populations, likely reflecting small total numbers of *P. falciparum* antigen specific B cells in circulation. The relationship between malaria protection and neutralizing antibodies is complex: despite a clear role for antibodies in protection against malaria, the association of serum antibody levels with protection is inconsistent [40,41]. It has been shown that malaria protection can be elicited by sufficiently high levels of neutralizing antibodies delivered via passive transfer [42], but it is likely that the antibody levels elicited in this IMRAS study cohort were insufficiently high to achieve protection alone, and require the participation of other mechanisms, such as malaria specific CD8+ T cells [43,44]. Also, our study is likely underpowered to discover different potential routes of protection from alternate antigens and to capture the breadth of antigen responses on an individual level. We did not explore Fc mediated antibody function, which has been previously associated with protection [40].

The biggest factor driving variability in transcriptome and circulating cell phenotype populations was individual variability. Each vaccinee occupied a distinct region of the dimensionality-reduced transcriptomic space (Figures S 1, S 2), illustrating that per-participant variability has a stronger effect than responses induced by vaccines. It is reasonable to assume that our limited

sample size has not extensively explored common human transcriptomic phenotypes, and further insights into RAS immunity would be accessible by profiling larger cohorts. Nevertheless, significantly altered transcriptome responses and cell type abundances associated with vaccination and protection were evident. Vaccine-induced responses were highly distinct after each vaccination. We identified multiple coherently expressed transcriptional responses significantly responsive to immunization. Responses associated with vaccination, but not protection, primarily comprised strong reductions in proliferative processes (protein synthesis, gene transcription, protein phosphorylation) and oxidative phosphorylation BTMs after immunization 2. Metabolic processes in whole blood reflect the sum of each individual cell types' metabolic program. As immune cells comprise the vast majority of nucleated blood cells, changes in metabolic gene expression in blood reflect changes in immune cell metabolism. Overall, vaccination-associated processes seem to represent broad shifts in immune cell metabolism and abundance after vaccination. Immature neutrophils use oxidative phosphorylation (OXPHOS) for energy production, while mature neutrophils rely on glycolysis [45]. Additionally, classically activated M1 macrophages and DCs upregulate glycolysis in preference to OXPHOS [46]. Thus, the reduction in OXPHOS and proliferative signaling after immunization 2 may reflect the increased presence of mature innate cell phenotypes. Additionally, OXPHOS is associated with anti-inflammatory M2 macrophages, while pro-inflammatory M1 macrophages rely on glycolysis [47]. Therefore, this reduction in OXPHOS after immunization 2 but not immunization 1 may reflect a shift in the balance of M1 vs M2 macrophages in the skin/site of infection after the first immunization. Alternatively, changes in OXPHOS signaling could be driven by T cell activation, as quiescent naïve and memory T cells primarily rely on OXPHOS, however activation via TCR stimulation causes a shift to glycolysis [48]. The large numbers of vaccine-induced genes observed immediately post-immunization contrasts with a recent whole-sporozoite with chloroquine prophylaxis vaccine study (CPS) with a similar number of participants and protective efficacy [8]. This is likely driven by the much smaller dose of sporozoites delivered: in the CPS study subjects received 5-15 bites from infected mosquitos per immunization vs. approximately 200 in IMRAS. However, BTMs implicated in protection largely overlapped between studies, including monocytes, neutrophils, inflammation and interferon.

Professional antigen presenting cells have an essential role in the development of vaccine-induced immunity, thus it is not surprising that monocyte and DC abundances were clearly induced by vaccination. In particular, multiple NC monocyte [30] subsets were increased after vaccination. In the original OMIP publication of the flow panel, these NC monocytes are referred to as double negative (DN) DCs, i.e. CD141- CD1c- CD14- CD11c+ cells which do not fall into the classical cDC1 or cDC2 classes and are not pDCs. However, we observed that almost all of these 'DN DCs' are CD16+. Previous work has shown that CD14dim CD16+ CD11c+ CD1c- CD141- cells are better described as non-classical monocytes and not DN DCs [49,50]. Thus, our results have consistently referred to non-classical (NC) vs. classical CD14+ monocytes. We saw increased abundance of classical CD14+ monocytes after the first immunization followed by increases in a broad mix of classical and non-classical monocytes after immunizations 3 and 5.

Along with myeloid cells, RAS vaccination was associated with changes in non-conventional T cell populations. We saw increases in MAIT cell abundances in response to RAS immunization with a tendency towards larger increases in protected individuals. Mpina, et al. [51] have shown a long-lived, dose-dependent increase in MAIT cells following resolution of infection after CHMI with *ex-vivo* experiments that associated MAIT activation with blood stage malaria parasitemia, but not RAS administered by direct venous injection. It is therefore possible that MAIT cell responses detected here reflect immune responses to the mosquito bite, however this would not account for a trend towards larger increases in protected individuals, suggesting further investigation of the role of MAIT cells in malaria protection. V $\delta$ 2  $\gamma\delta$ T cells have been previously shown to be intrinsically activated by malaria [52,53] and elevated in protected individuals after whole-sporozoite vaccination[54]. We observed a consistent increase in V $\delta$ 2  $\gamma\delta$ T cell counts over the entire course of vaccination and non-protected individuals trended towards larger cumulative increases in these cells. This was particularly apparent after the fifth immunization, although this difference was not statistically significant. While this may appear at odds with the described protective role of V $\delta$ 2  $\gamma\delta$ T cells, other work suggests a complex relationship between V $\delta$ 2  $\gamma\delta$ T and malaria immunity: it has been reported that a decrease in V $\delta$ 2  $\gamma\delta$ T cells levels is associated with tolerance [55] and reduced severity of malaria infection[56].

We previously observed a detrimental role of type I interferon in the development of malaria protection after prime immunization and a correlation between it and non-classical monocytes. In the current study, we have further explored the dynamics of interferon response following RAS vaccination and observed that type I interferon was negatively associated with the initial establishment of adaptive memory, but positively correlated with memory expansion upon boosting. We also saw that these interferon responses were significantly correlated with monocyte frequency, consistent with our previous findings. A potential explanation for this phenomenon is that over-induction of type I interferon inhibits the initial establishment of memory cell populations. Sporozoite antigens are taken up and presented by DCs after caspase-mediated cell death [57], and type I interferon can inhibit caspase activity [58] and hence antigen presentation. The detrimental role of interferon in the development of CD8+ T cells mediated immunity has also been observed in animal models [44]. It remains to be seen whether the role of interferon in is specific to RAS immunization or is relevant to the development of human liver-stage malaria immunity more broadly. Radiation-attenuated sporozoites cannot replicate in the liver resulting in incomplete liver stage development without expansion of parasite mass. This is different in key respects to other whole-sporozoite vaccination approaches such as vaccination using late-arresting genetically attenuated sporozoites [11] or administration of live sporozoites with anti-malarial prophylaxis [8,12], which allow liver stage parasite expansion. Thus, the arrested nature of the RAS liver stage may explain the transient nature of the IFN transcriptional responses that peaked 1-3 days post immunization.

While abundances of CD14+ and NC monocyte populations were not significantly associated with protection, different monocyte subsets were correlated with interferon transcriptional responses after immunizations 1, 3 and 5, suggesting that the distinct protection-associated roles of interferon after immunization 1 vs immunizations 2-5 may reflect the balance of



classical vs. non-classical monocytes responding to vaccination. Specifically, protection-associated interferon transcriptional responses were correlated with increased levels of both CD14+ and NC monocyte subsets, while the non-protective interferon responses after the 1<sup>st</sup> immunization were correlated with CD14+ subsets only. Interestingly, increased abundance of non-classical CD14dim CD16+ monocytes has been previously linked to reduced serum inflammatory cytokine levels and less severe malaria in children [59], pointing to a key role for these monocyte subsets in resolving the inflammatory response to malaria. Thus, NC monocytes may play an immune regulatory role in response to RAS immunization, and effective vaccine mediated immunity may require a balance between classical and non-classical monocyte responses. The sole protection-associated cell type we identified was CD40+ CD1c+ DCs, which are activated cDC2 cells. cDC2s are the predominant DC population in blood, and can cross present to and potentially activate Th1, Th2, Th17 and CD8+ T cells [60]. CD40 is a co-stimulatory molecule that plays a central role in T and B cell activation and regulation when expressed on DCs [61]. CD40 has been shown to be required for liver-stage protective immunity to malaria infection in a mouse model [62]. It has also been observed that blood derived DCs upregulated CD40 upon exposure to *P. falciparum* infected red blood cells [63]. CD40+ CD1c+ DC abundances were also correlated with interferon responses across all timepoints and specifically after immunization 3 in pattern similar to many NC monocyte subsets, suggesting that NC monocytes and DCs may play a coordinated role mediating expansion of adaptive memory responses.

Apart from interferon-associated signaling, BTMs associated with inflammation, cytokines and chemokines, monocytes, neutrophils, and erythroid cells were identified as protection associated by GSEA. In general, protected individuals showed reduced induction of these processes immediately after every immunization, distinct from what we saw with interferon. However, it is difficult to disentangle the specific role each of these individual processes play in protection. Interestingly, we have seen that increased pre-vaccination abundance of BTMs associated with inflammation, monocytes, and neutrophils was associated with protection against malaria challenge [64], raising the possibility that the reduced responses seen in protected individuals post-immunization is due to their higher baseline expression of these modules, giving them an immunological ‘head start’ in responding to immunization more broadly. That hypothesis is supported by a recent cross-study analysis of 13 different vaccines showing that a heightened inflammatory state prior to immunization marked by increased expression of monocytes, dendritic cells and pro-inflammatory genes was associated with higher serum antibody responses across vaccines [65]. Multiple BTMs associated with erythroid cells were identified as increased and negatively associated with protection 1-3 days post-immunization after the first three immunizations. It is not immediately clear why erythroid cell-associated processes might be important for RAS-mediated protection, but there are several possible explanations. For example, increased erythroid cell BTMs may reflect anemia of inflammation [66] where inflammation induces upregulation of hepcidin in the liver, resulting in iron retention in macrophages and reduction in erythroid cell differentiation and proliferation via inhibition of erythropoietin. Also, it has been shown that type I interferon is involved in hematopoiesis [67,68] and activates dormant hematopoietic stem cells. Increased prostaglandin BTMs were also associated with protection and their role may intersect with

erythroid cell signaling, as free heme impairs the anti-inflammatory prostaglandin E<sub>2</sub> [69] while decreased levels of plasma-circulating prostaglandin E<sub>2</sub> were correlated with more severe malaria disease in children [70].

Taken together, our systems immunology profiling results demonstrate that a finely tuned and coordinated set of immune responses are involved in establishing protection after RAS immunization, in particular the interplay between interferon transcriptional responses and classical and non-classical monocyte abundances. These also include responses previously reported, and observed here, to be induced by whole sporozoite vaccines (e.g. expansion of Vδ2 γδT cells) and more general inflammatory, antigen uptake and presentation responses necessary for development of immunity from any vaccine. This work has revealed that the coordination of protection-associated peripheral blood responses is complex, highly variable on an individual level and distinct after each vaccination. We hope that the unprecedented depth and resolution of our analyses will inform future design and interpretation of whole-sporozoite vaccine trials.

## REFERENCES

1. Kester KE, Cummings JF, Ofori-Anyinam O, Ockenhouse CF, Krzych U, Moris P, et al. Randomized, double-blind, phase 2a trial of falciparum malaria vaccines RTS,S/AS01B and RTS,S/AS02A in malaria-naïve adults: safety, efficacy, and immunologic associates of protection. *J Infect Dis*. 2009;200: 337–46. doi:10.1086/600120
2. Olotu A, Fegan G, Wambua J, Nyangweso G, Leach A, Lievens M, et al. Seven-Year Efficacy of RTS,S/AS01 Malaria Vaccine among Young African Children. *N Engl J Med*. 2016;374: 2519–29. doi:10.1056/NEJMoa1515257
3. Dattoo MS, Natama MH, Somé A, Traoré O, Rouamba T, Bellamy D, et al. Efficacy of a low-dose candidate malaria vaccine, R21 in adjuvant Matrix-M, with seasonal administration to children in Burkina Faso: a randomised controlled trial. *Lancet*. 2021;397: 1809–1818. doi:10.1016/S0140-6736(21)00943-0
4. Nussenzweig RS, Vanderberg J, Most H, Orton C. Protective immunity produced by the injection of x-irradiated sporozoites of plasmodium berghei. *Nature*. 1967;216: 160–2. doi:10.1038/216160a0
5. Clyde DF, Most H, McCarthy VC, Vanderberg JP. Immunization of man against sporozoite-induced falciparum malaria. *Am J Med Sci*. 1973;266: 169–77. doi:10.1097/00000441-197309000-00002
6. Sissoko MS, Healy SA, Katile A, Zaidi I, Hu Z, Kamate B, et al. Safety and efficacy of a three-dose regimen of Plasmodium falciparum sporozoite vaccine in adults during an intense malaria transmission season in Mali: a randomised, controlled phase 1 trial. *Lancet Infect Dis*. 2022;22: 377–389. doi:10.1016/S1473-3099(21)00332-7
7. Sissoko MS, Healy SA, Katile A, Omaswa F, Zaidi I, Gabriel EE, et al. Safety and efficacy of PfSPZ Vaccine against Plasmodium falciparum via direct venous inoculation in healthy malaria-exposed adults in Mali: a randomised, double-blind phase 1 trial. *Lancet Infect Dis*. 2017;17: 498–509. doi:10.1016/S1473-3099(17)30104-4
8. Tran TM, Bijker EM, Haks MC, Ottenhoff THM, Visser L, Schats R, et al. Whole-blood transcriptomic signatures induced during immunization by chloroquine prophylaxis and Plasmodium falciparum sporozoites. *Sci Rep*. 2019;9: 8386. doi:10.1038/s41598-019-44924-7
9. Roestenberg M, McCall M, Hopman J, Wiersma J, Luty AJF, van Gemert GJ, et al. Protection against a malaria challenge by sporozoite inoculation. *N Engl J Med*. 2009;361: 468–77. doi:10.1056/NEJMoa0805832
10. Vaughan AM, Kappe SHI. Genetically attenuated malaria parasites as vaccines. *Expert Rev Vaccines*. 2017;16: 765–767. doi:10.1080/14760584.2017.1341835
11. Goswami D, Betz W, Locham NK, Parthiban C, Brager C, Schäfer C, et al. A replication-competent late liver stage-attenuated human malaria parasite. *JCI insight*. 2020;5. doi:10.1172/jci.insight.135589
12. Mwakingwe-Omari A, Healy SA, Lane J, Cook DM, Kalhori S, Wyatt C, et al. Two chemoattenuated PfSPZ malaria vaccines induce sterile hepatic immunity. *Nature*. 2021;595. doi:10.1038/s41586-021-03684-z
13. Du Y, Hertoghs N, Duffy FJ, Carnes J, McDermott SM, Neal ML, et al. Systems analysis of immune responses to attenuated P. falciparum malaria sporozoite vaccination reveals

- excessive inflammatory signatures correlating with impaired immunity. PLoS Pathog. 2022;18: e1010282. doi:10.1371/journal.ppat.1010282
14. Sedegah M, Hollingdale MR, Ganeshan H, Belmonte M, Huang J, Belmonte A, et al. IMRAS-Immunization with radiation-attenuated Plasmodium falciparum sporozoites by mosquito bite: Cellular immunity to sporozoites, CSP, AMA1, TRAP and CelTOS. Diemert DJ, editor. PLoS One. 2021;16: e0256396. doi:10.1371/journal.pone.0256396
15. Hickey B, Teneza-Mora N, Lumsden J, Reyes S, Sedegah M, Garver L, et al. IMRAS—A clinical trial of mosquito-bite immunization with live, radiation-attenuated P. falciparum sporozoites: Impact of immunization parameters on protective efficacy and generation of a repository of immunologic reagents. PLoS One. 2020;15: 1–30. doi:10.1371/journal.pone.0233840
16. Gonzales SJ, Reyes RA, Braddom AE, Batugedara G, Bol S, Bunnik EM. Naturally Acquired Humoral Immunity Against Plasmodium falciparum Malaria. Front Immunol. 2020;11: 594653. doi:10.3389/fimmu.2020.594653
17. McCallum FJ, Persson KEM, Fowkes FJI, Reiling L, Mugenyi CK, Richards JS, et al. Differing rates of antibody acquisition to merozoite antigens in malaria: implications for immunity and surveillance. J Leukoc Biol. 2017;101: 913–925. doi:10.1189/jlb.5MA0716-294R
18. Doolan DL, Dobaño C, Baird JK. Acquired immunity to Malaria. Clin Microbiol Rev. 2009;22: 13–36. doi:10.1128/CMR.00025-08
19. Lautenbach MJ, Yman V, Silva CS, Kadri N, Broumou I, Chan S, et al. Systems analysis shows a role of cytophilic antibodies in shaping innate tolerance to malaria. Cell Rep. 2022;39: 110709. doi:10.1016/j.celrep.2022.110709
20. Keitany GJ, Kim KS, Krishnamurthy AT, Hondowicz BD, Hahn WO, Dambrauskas N, et al. Blood Stage Malaria Disrupts Humoral Immunity to the Pre-erythrocytic Stage Circumsporozoite Protein. Cell Rep. 2016;17: 3193–3205. doi:10.1016/j.celrep.2016.11.060
21. Wilson NS, Behrens GMN, Lundie RJ, Smith CM, Waithman J, Young L, et al. Systemic activation of dendritic cells by Toll-like receptor ligands or malaria infection impairs cross-presentation and antiviral immunity. Nat Immunol. 2006;7: 165–72. doi:10.1038/ni1300
22. Dobin A, Gingeras TR. Mapping RNA-seq Reads with STAR. Current Protocols in Bioinformatics. Hoboken, NJ, USA: John Wiley & Sons, Inc.; 2015. pp. 11.14.1-11.14.19. doi:10.1002/0471250953.bi1114s51
23. Putri GH, Anders S, Pyl PT, Pimanda JE, Zanini F. Analysing high-throughput sequencing data in Python with HTSeq 2.0. Bioinformatics. 2022. doi:10.1093/bioinformatics/btac166
24. Zhang Y, Parmigiani G, Johnson WE. ComBat-seq: batch effect adjustment for RNA-seq count data. NAR genomics Bioinforma. 2020;2: lqaa078. doi:10.1093/nargab/lqaa078
25. Ritchie ME, Phipson B, Wu D, Hu Y, Law CW, Shi W, et al. Limma powers differential expression analyses for RNA-sequencing and microarray studies. Nucleic Acids Res. 2015;43: e47. doi:10.1093/nar/gkv007
26. Law CW, Chen Y, Shi W, Smyth GK. voom: precision weights unlock linear model analysis tools for RNA-seq read counts. Genome Biol. 2014;15: R29. doi:10.1186/gb-2014-15-2-

758 r29  
759 27. Hoffman GE, Roussos P. Dream: powerful differential expression analysis for repeated  
760 measures designs. *Bioinformatics*. 2021;37: 192–201.  
761 doi:10.1093/bioinformatics/btaa687  
762 28. Korotkevich G, Sukhov V, Budin N, Shpak B, Artyomov MN, Sergushichev A. Fast gene set  
763 enrichment analysis. *bioRxiv*. 2021; 60012. doi:10.1101/060012  
764 29. Rinchai D, Roelands J, Toufiq M, Hendrickx W, Altman MC, Bedognetti D, et al.  
765 BloodGen3Module: blood transcriptional module repertoire analysis and visualization  
766 using R. *Bioinformatics*. 2021;37: 2382–2389. doi:10.1093/bioinformatics/btab121  
767 30. Mair F, Prlic M. OMIP-044: 28-color immunophenotyping of the human dendritic cell  
768 compartment. *Cytometry A*. 2018;93: 402–405. doi:10.1002/cyto.a.23331  
769 31. Hertoghs N, Schwedhelm K V, Stuart KD, McElrath MJ, De Rosa SC. OMIP-064: A 27-Color  
770 Flow Cytometry Panel to Detect and Characterize Human NK Cells and Other Innate  
771 Lymphoid Cell Subsets, MAIT Cells, and  $\gamma\delta$  T Cells. *Cytometry A*. 2020;97: 1019–1023.  
772 doi:10.1002/cyto.a.24031  
773 32. Bates D, Mächler M, Bolker B, Walker S. Fitting Linear Mixed-Effects Models Using lme4. *J*  
774 *Stat Softw*. 2015;67. doi:10.18637/jss.v067.i01  
775 33. Coley AM, Gupta A, Murphy VJ, Bai T, Kim H, Foley M, et al. Structure of the malaria  
776 antigen AMA1 in complex with a growth-inhibitory antibody. *PLoS Pathog*. 2007;3: 1308–  
777 19. doi:10.1371/journal.ppat.0030138  
778 34. Akhouri RR, Bhattacharyya A, Pattnaik P, Malhotra P, Sharma A. Structural and functional  
779 dissection of the adhesive domains of Plasmodium falciparum thrombospondin-related  
780 anonymous protein (TRAP). *Biochem J*. 2004;379: 815–22. doi:10.1042/BJ20031500  
781 35. Coppi A, Natarajan R, Pradel G, Bennett BL, James ER, Roggero MA, et al. The malaria  
782 circumsporozoite protein has two functional domains, each with distinct roles as  
783 sporozoites journey from mosquito to mammalian host. *J Exp Med*. 2011;208: 341–56.  
784 doi:10.1084/jem.20101488  
785 36. Seder RA, Chang LJ, Enama ME, Zephir KL, Sarwar UN, Gordon IJ, et al. Protection against  
786 malaria by intravenous immunization with a nonreplicating sporozoite vaccine. *Science*  
787 (80- ). 2013;341: 1359–1365. doi:10.1126/science.1241800  
788 37. Lyke KE, Ishizuka AS, Berry AA, Chakravarty S, DeZure A, Enama ME, et al. Attenuated  
789 PfSPZ Vaccine induces strain-transcending T cells and durable protection against  
790 heterologous controlled human malaria infection. *Proc Natl Acad Sci U S A*. 2017;114:  
791 2711–2716. doi:10.1073/pnas.1615324114  
792 38. Duffy FJ, Du Y, Carnes J, Epstein JE, Hoffman SL, Abdulla S, et al. Early whole blood  
793 transcriptional responses to radiation-attenuated Plasmodium falciparum sporozoite  
794 vaccination in malaria naïve and malaria pre-exposed adult volunteers. *Malar J*. 2021;20:  
795 308. doi:10.1186/s12936-021-03839-3  
796 39. Jongo SA, Shekalaghe SA, Church LWP, Ruben AJ, Schindler T, Zenklusen I, et al. Safety,  
797 Immunogenicity, and Protective Efficacy against Controlled Human Malaria Infection of  
798 Plasmodium falciparum Sporozoite Vaccine in Tanzanian Adults. *Am J Trop Med Hyg*.  
799 2018;99: 338–349. doi:10.4269/ajtmh.17-1014  
800 40. Suscovich TJ, Fallon JK, Das J, Demas AR, Crain J, Linde CH, et al. Mapping functional  
801 humoral correlates of protection against malaria challenge following RTS,S/AS01



802 vaccination. *Sci Transl Med*. 2020;12. doi:10.1126/SCITRANSLMED.ABB4757

803 41. Cockburn IA, Seder RA. Malaria prevention: from immunological concepts to effective  
804 vaccines and protective antibodies. *Nat Immunol*. 2018;19: 1199–1211.  
805 doi:10.1038/s41590-018-0228-6

806 42. Gaudinski MR, Berkowitz NM, Idris AH, Coates EE, Holman LA, Mendoza F, et al. A  
807 Monoclonal Antibody for Malaria Prevention. *N Engl J Med*. 2021; 1–12.  
808 doi:10.1056/NEJMoa2034031

809 43. Epstein JE, Tewari K, Lyke KE, Sim BKL, Billingsley PF, Laurens MB, et al. Live attenuated  
810 malaria vaccine designed to protect through hepatic CD8<sup>+</sup> T cell immunity. *Science*.  
811 2011;334: 475–80. doi:10.1126/science.1211548

812 44. Minkah NK, Wilder BK, Sheikh AA, Martinson T, Wegmair L, Vaughan AM, et al. Innate  
813 immunity limits protective adaptive immune responses against pre-erythrocytic malaria  
814 parasites. *Nat Commun*. 2019;10: 1–14. doi:10.1038/s41467-019-11819-0

815 45. Jeon J-H, Hong C-W, Kim EY, Lee JM. Current Understanding on the Metabolism of  
816 Neutrophils. *Immune Netw*. 2020;20: e46. doi:10.4110/in.2020.20.e46

817 46. Kelly B, O'Neill LAJ. Metabolic reprogramming in macrophages and dendritic cells in  
818 innate immunity. *Cell Res*. 2015;25: 771–84. doi:10.1038/cr.2015.68

819 47. Viola A, Munari F, Sánchez-Rodríguez R, Scolaro T, Castegna A. The Metabolic Signature  
820 of Macrophage Responses. *Front Immunol*. 2019;10: 1462.  
821 doi:10.3389/fimmu.2019.01462

822 48. Jones RG, Thompson CB. Revving the Engine: Signal Transduction Fuels T Cell Activation.  
823 *Immunity*. 2007;27: 173–178. doi:10.1016/j.immuni.2007.07.008

824 49. Calzetti F, Tamassia N, Micheletti A, Finotti G, Bianchetto-Aguilera F, Cassatella MA.  
825 Human dendritic cell subset 4 (DC4) correlates to a subset of CD14dim/-CD16++  
826 monocytes. *J Allergy Clin Immunol*. 2018;141: 2276-2279.e3.  
827 doi:10.1016/j.jaci.2017.12.988

828 50. Dutertre C-A, Becht E, Irac SE, Khalilnezhad A, Narang V, Khalilnezhad S, et al. Single-Cell  
829 Analysis of Human Mononuclear Phagocytes Reveals Subset-Defining Markers and  
830 Identifies Circulating Inflammatory Dendritic Cells. *Immunity*. 2019;51: 573-589.e8.  
831 doi:10.1016/j.immuni.2019.08.008

832 51. Mpina M, Maurice NJ, Yajima M, Slichter CK, Miller HW, Dutta M, et al. Controlled  
833 Human Malaria Infection Leads to Long-Lasting Changes in Innate and Innate-like  
834 Lymphocyte Populations. *J Immunol*. 2017;199: 107–118.  
835 doi:10.4049/jimmunol.1601989

836 52. Behr C, Dubois P. Preferential expansion of V gamma 9 V delta 2 T cells following  
837 stimulation of peripheral blood lymphocytes with extracts of *Plasmodium falciparum*. *Int*  
838 *Immunol*. 1992;4: 361–6. doi:10.1093/intimm/4.3.361

839 53. Dantzler KW, Jagannathan P.  $\gamma\delta$  T Cells in Antimalarial Immunity: New Insights Into Their  
840 Diverse Functions in Protection and Tolerance. *Front Immunol*. 2018;9: 2445.  
841 doi:10.3389/fimmu.2018.02445

842 54. Zaidi I, Diallo H, Conteh S, Robbins Y, Kolasny J, Orr-Gonzalez S, et al.  $\gamma\delta$  T Cells Are  
843 Required for the Induction of Sterile Immunity during Irradiated Sporozoite Vaccinations.  
844 *J Immunol*. 2017;199: 3781–3788. doi:10.4049/jimmunol.1700314

845 55. Pamplona A, Silva-Santos B.  $\gamma\delta$  T cells in malaria: a double-edged sword. *FEBS J*.



- 2021;288: 1118–1129. doi:10.1111/febs.15494
56. Jagannathan P, Kim CC, Greenhouse B, Nankya F, Bowen K, Eccles-James I, et al. Loss and dysfunction of Vδ2<sup>+</sup> γδ T cells are associated with clinical tolerance to malaria. *Sci Transl Med*. 2014;6: 251ra117. doi:10.1126/scitranslmed.3009793
57. Kurup SP, Anthony SM, Hancox LS, Vijay R, Pewe LL, Moioffer SJ, et al. Monocyte-Derived CD11c<sup>+</sup> Cells Acquire Plasmodium from Hepatocytes to Prime CD8 T Cell Immunity to Liver-Stage Malaria. *Cell Host Microbe*. 2019;25: 565-577.e6. doi:10.1016/j.chom.2019.02.014
58. Veeranki S, Duan X, Panchanathan R, Liu H, Choubey D. IFI16 protein mediates the anti-inflammatory actions of the type-I interferons through suppression of activation of caspase-1 by inflammasomes. *PLoS One*. 2011;6: e27040. doi:10.1371/journal.pone.0027040
59. Royo J, Rahabi M, Kamaliddin C, Ezinmegnon S, Olganier D, Authier H, et al. Changes in monocyte subsets are associated with clinical outcomes in severe malarial anaemia and cerebral malaria. *Sci Rep*. 2019;9: 1–13. doi:10.1038/s41598-019-52579-7
60. Collin M, Bigley V. Human dendritic cell subsets: an update. *Immunology*. 2018;154: 3–20. doi:10.1111/imm.12888
61. Ma DY, Clark EA. The role of CD40 and CD154/CD40L in dendritic cells. *Semin Immunol*. 2009;21: 265–272. doi:10.1016/j.smim.2009.05.010
62. Murray SA, Mohar I, Miller JL, Brempelis KJ, Vaughan AM, Kappe SHI, et al. CD40 Is Required for Protective Immunity against Liver Stage Plasmodium Infection . *J Immunol*. 2015;194: 2268–2279. doi:10.4049/jimmunol.1401724
63. Götz A, Tang MS, Ty MC, Arama C, Ongoiba A, Doumtabe D, et al. Atypical activation of dendritic cells by Plasmodium falciparum. *Proc Natl Acad Sci U S A*. 2017;114: E10568–E10577. doi:10.1073/pnas.1708383114
64. Neal ML, Duffy FJ, Du Y, Aitchison JD, Stuart KD. Preimmunization correlates of protection shared across malaria vaccine trials in adults. *npj Vaccines*. 2022;7. doi:10.1038/s41541-021-00425-1
65. Fourati S, Tomalin L, Mule M, Chawla D, Gerritson B, Rychkov D, et al. An innate immune activation state prior to vaccination predicts responsiveness to multiple vaccines  
Authors : Affiliations : Abstract : Introduction : Biorxiv. 2021. doi:10.1101/2021.09.26.461847
66. Weiss G, Ganz T, Goodnough LT. Anemia of inflammation. *Blood*. 2019;133: 40–50. doi:10.1182/blood-2018-06-856500
67. Essers MAG, Offner S, Blanco-Bose WE, Waibler Z, Kalinke U, Duchosal MA, et al. IFNα activates dormant haematopoietic stem cells in vivo. *Nature*. 2009;458: 904–8. doi:10.1038/nature07815
68. Demerdash Y, Kain B, Essers MAG, King KY. Yin and Yang: The dual effects of interferons on hematopoiesis. *Exp Hematol*. 2021;96: 1–12. doi:10.1016/j.exphem.2021.02.002
69. Andrade BB, Araújo-Santos T, Luz NF, Khouri R, Bozza MT, Camargo LMA, et al. Heme impairs prostaglandin E2 and TGF-beta production by human mononuclear cells via Cu/Zn superoxide dismutase: insight into the pathogenesis of severe malaria. *J Immunol*. 2010;185: 1196–204. doi:10.4049/jimmunol.0904179
70. Perkins DJ, Kremsner PG, Weinberg JB. Inverse relationship of plasma prostaglandin E2

890 and blood mononuclear cell cyclooxygenase-2 with disease severity in children with  
891 Plasmodium falciparum malaria. J Infect Dis. 2001;183: 113–8. doi:10.1086/317660  
892

## SUPPLEMENTARY MATERIAL

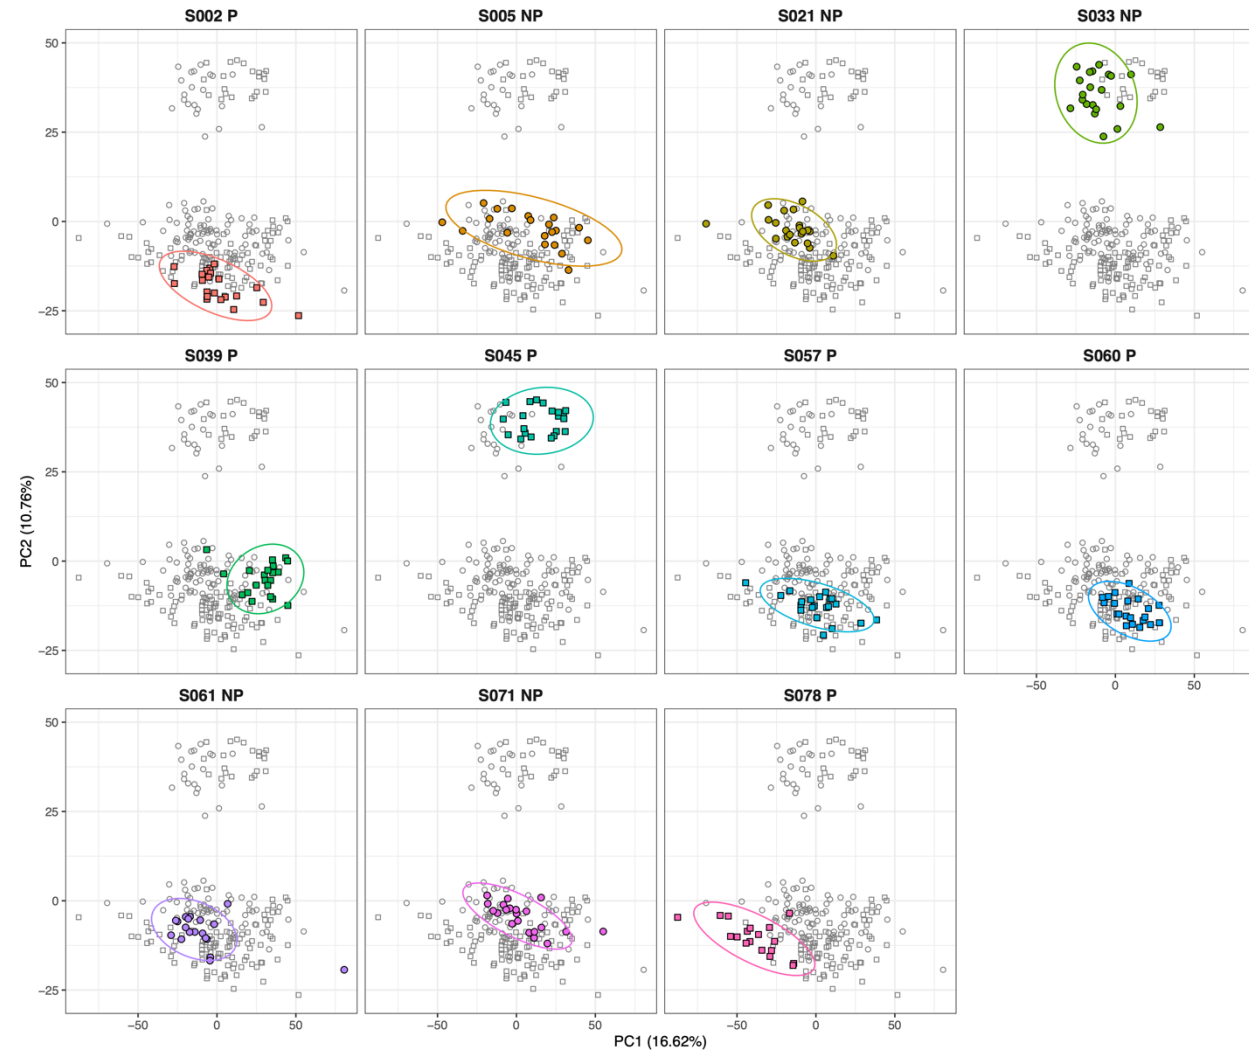

**Figure S 1** Principal component analysis plots of normalized whole blood gene expression data. Each panel shows colored points corresponding to all timepoints from a single participant with samples from other study participants shown in grey.

899

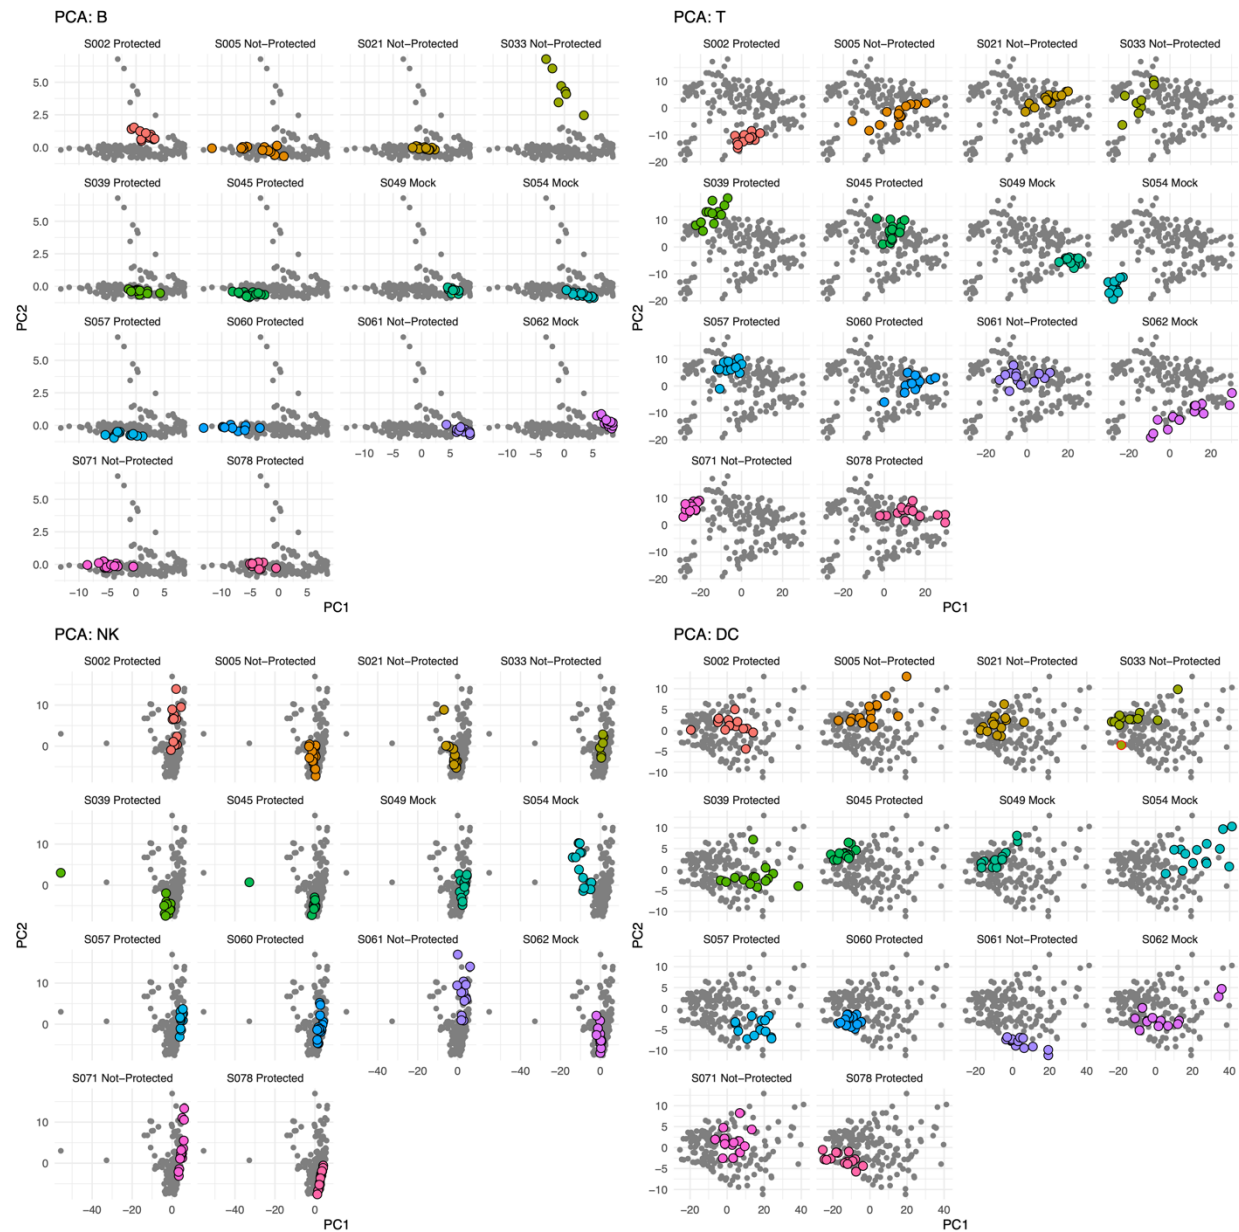

**Figure S 2:** Principal component analysis plots of cell-type profiles determined by flow-cytometry. Each plot panel shows the first two principal components per-sample from flow panels **for** B-cells; CD3+ T cells; NK and invariant T-cells; **and** DCs and other antigen presenting cells respectively. Each sub-panel is labelled and colored to highlight a single study participant, with the remaining samples shown in grey.

| DC/APC panel | T panel   | B panel   | NK panel  |
|--------------|-----------|-----------|-----------|
| Viability    | Ki-67     | Ki-67     | Ki-67     |
| CD45         | Viability | Viability | Viability |

|        |        |        |           |
|--------|--------|--------|-----------|
| CD19   | CD3    | CD3    | CD19      |
| CD4    | CD8    | CD19   | CD8       |
| CD3    | CD4    | CD21   | CD14      |
| CD8    | CD56   | CD38   | CD4       |
| CD56   | CD19   | CD5    | CD3       |
| CD45RA | CD14   | CD24   | CD56      |
| CD14   | CD45RA | CD27   | CD57      |
| CD141  | HLA-DR | HLA-DR | CD16      |
| CD1c   | CD25   | CD11c  | CD38      |
| CD123  | CD69   | IgG    | NKG2D     |
| CD11c  | PD-1   | IgM    | NKG2A     |
| HLA-DR | CD38   | IgD    | NKG2C     |
| CD11b  | Lag3   | IgA    | NKp30     |
| CD40   | CTLA-4 | CD86   | NKp44     |
| CD80   | CCR7   | CD80   | NKp46     |
| CD86   | CD127  | BAFFR  | HLA-DR    |
| CD16   | CXCR5  | GL7    | TCRgd     |
| CD32   | CXCR6  | PD-L2  | Vd2 TCR   |
| CCR7   | CXCR3  | FCRL4  | TCRva7.2  |
| CD163  | Tbet   | FCRL5  | CD127     |
| CX3CR1 | FOXP3  |        | CD161     |
| CD26   |        |        | CD27      |
| CD272  |        |        | CRTh2     |
| CD172a |        |        | c-kit     |
| CD38   |        |        | Fcepsilon |
| CD85k  |        |        |           |

**Table S 1:** Flow cytometry panel marker panels. Each column lists the protein markers used in each flow-cytometry panel in this study

**Datafile S 1:** Limma-dream results table of significant (FDR < 0.05) vaccine-induced genes

**Datafile S 2:** Gating diagrams for each flow cytometry panel

**Datafile S 3:** Mixed-model p-values and high-level cell type grouping for each vaccine-induced cell type

**Datafile S 4:** Serum antibody array mean fluorescent intensity (MFI) array profiling data for each antigen and sample, normalized relative to IVTT controls.

**Datafile S 5:** Gated flow cytometry count table, annotated with cell types for each participant at each timepoint

## DATA AVAILABILITY

Whole blood transcriptional data is available on NCBI GEO under accessions GSE116619 (Days 0-28) and GSE192756 (Days 31-140). Antibody microarray profiling results and flow cytometry subset counts are available as **Datafiles S 4** and **S 5** respectively, with raw data available in ImmPort.

## ACKNOWLEDGEMENTS

We would like to acknowledge all the IMRAS study participants who made this work possible. We thank the Naval Medical Research Center (NMRC) Malaria Department, the Clinical Trials Center, and the Clinical Immunology Laboratory staff led by Dr. Eileen Villasante, Dr. Judith Epstein, Dr. Martha Sedegah, respectively, that conducted the IMRAS clinical trial and processed, cryopreserved, inventoried and transferred the clinical samples.

## COMPETING INTERESTS

The authors declare that no competing interests exist.

## FUNDING

This work was supported by National Institutes of Health (<https://www.nih.gov/grants-funding>) grant U19AI128914 (to K.D.S and M.J.M), Bill & Melinda Gates Foundation (<https://www.ghvap.org/Pages/default.aspx>) grant GHVAP NG-ID18-Stuart (to K.D.S) and National Institute of General Medical Sciences (<https://www.nigms.nih.gov/>) grant P41GM109824 to (J.D.A). The IMRAS clinical trial was funded by the Bill & Melinda Gates Foundation (BMGF) through Global Health Grant Number OPP1034596 awarded to the Naval Medical Research Center (NMRC) under cooperative research and development agreement (CRADA) NMRC-12-3941 and NMRC-15-0579. The funders had no role in study design, data collection, analysis and in decision to publish, or preparation of the manuscript.
