# Supplementary material for: Longitudinal immune profiling after radiation-attenuated sporozoite vaccination reveals coordinated immune processes correlated with malaria protection
Source: bioRxiv or medRxiv preprint supplement (doi:10.1101/2022.09.12.22279869), 2022-09-14

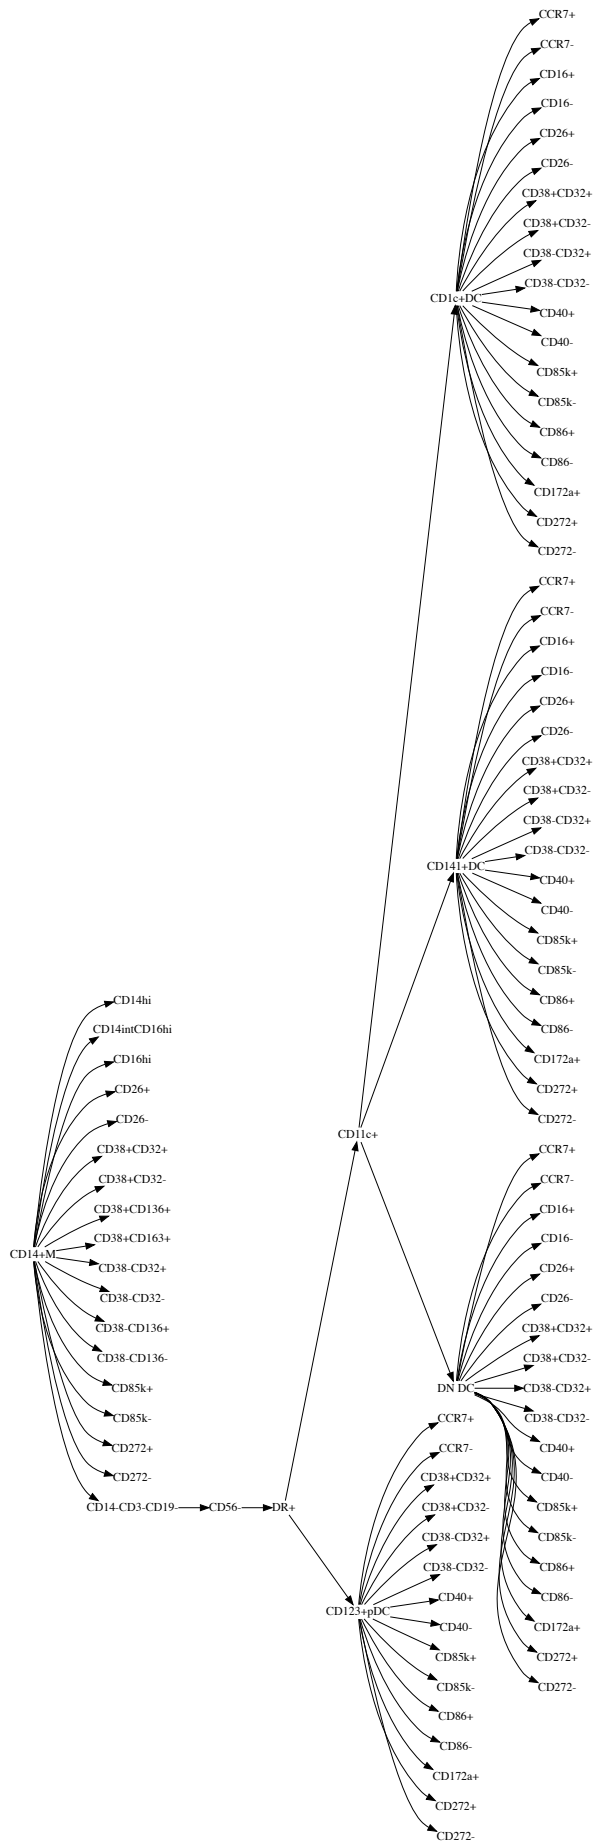

**DC/APC gating**

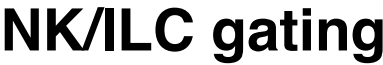

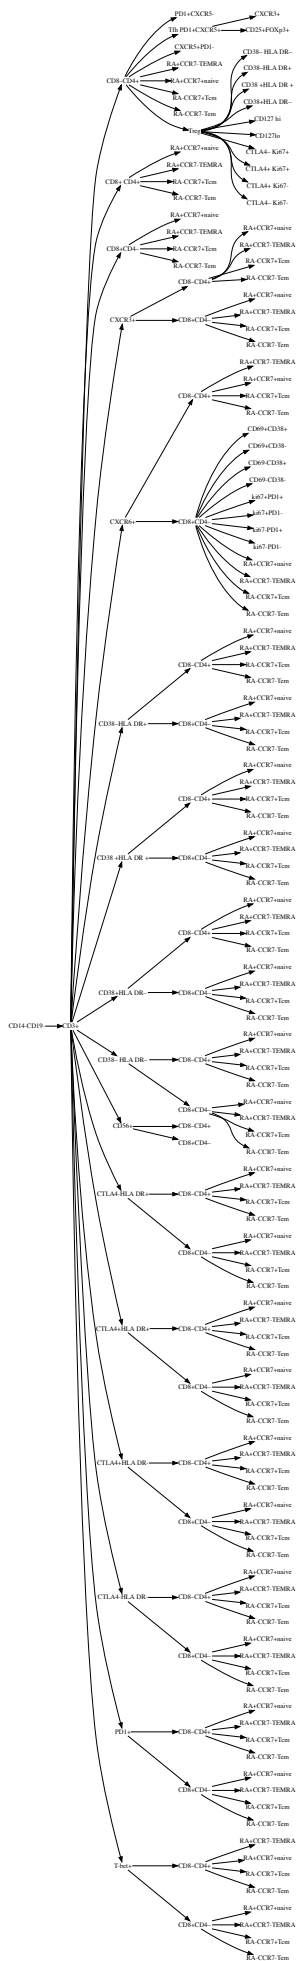

# T cell gating

# B cell gating

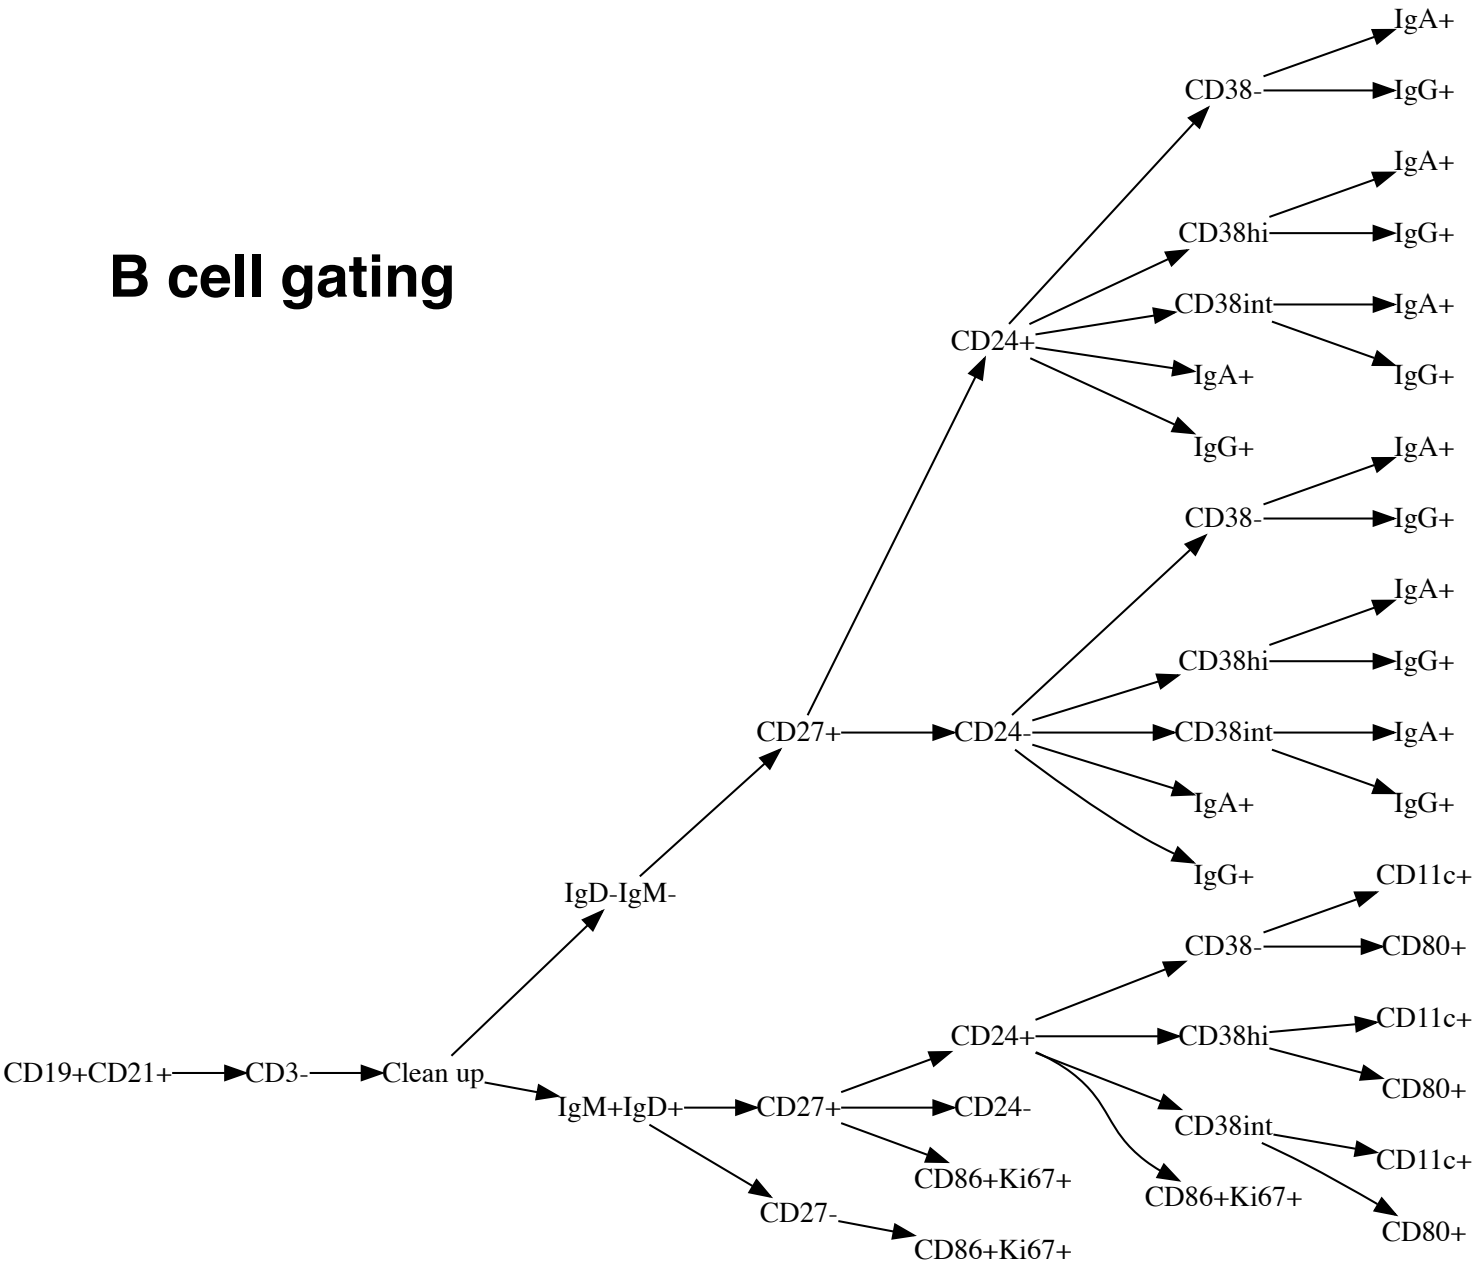

Supplement: Supplementary file [file media-1.zip]
